# Supplementary material for: Nectar Chemistry or Flower Morphology—What Is More Important for the Reproductive Success of Generalist Orchid Epipactis palustris in Natural and Anthropogenic Populations?
Source: MDPI journal article supplement (doi:10.3390/ijms222212164), 2021-11-10
Supplement: s1 [file s1]

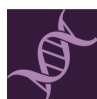

## Supplementary materials

**Figure S1.** Boxplots of floral display and flower structure in *Epipactis palustris* natural (Nat.) and anthropogenic (Ant.) populations ( $n = 30$ ). Colored dots are individual samples. The crossed square shows the mean. The lower and upper hinges correspond to the lower ( $Q_1$ ) and upper ( $Q_3$ ) quartiles. Thus box length shows the interquartile range (IQR). The thicker line inside boxes corresponds to the median. The lower whisker extends from the hinge to the smallest value at most  $Q_1 - 1.5 \times \text{IQR}$  of the hinge. The upper whisker extends from the hinge to the largest value no further than  $Q_3 + 1.5 \times \text{IQR}$ . Data beyond the end of the whiskers, indicated with an asterisk symbol, are outliers. Different lowercase letters indicate statistically significant differences according to Tukey's post-hoc test ( $p < 0.05$ ). Different uppercase letters indicate statistically significant differences according to the pairwise Wilcoxon Rank Sum test with Benjamini-Hochberg adjustment ( $p < 0.05$ ). Symbol '=' means 'do not differ significantly'. Additional comparisons on the right side were shown only when populations within Nat. and/or Ant. do not differ significantly.

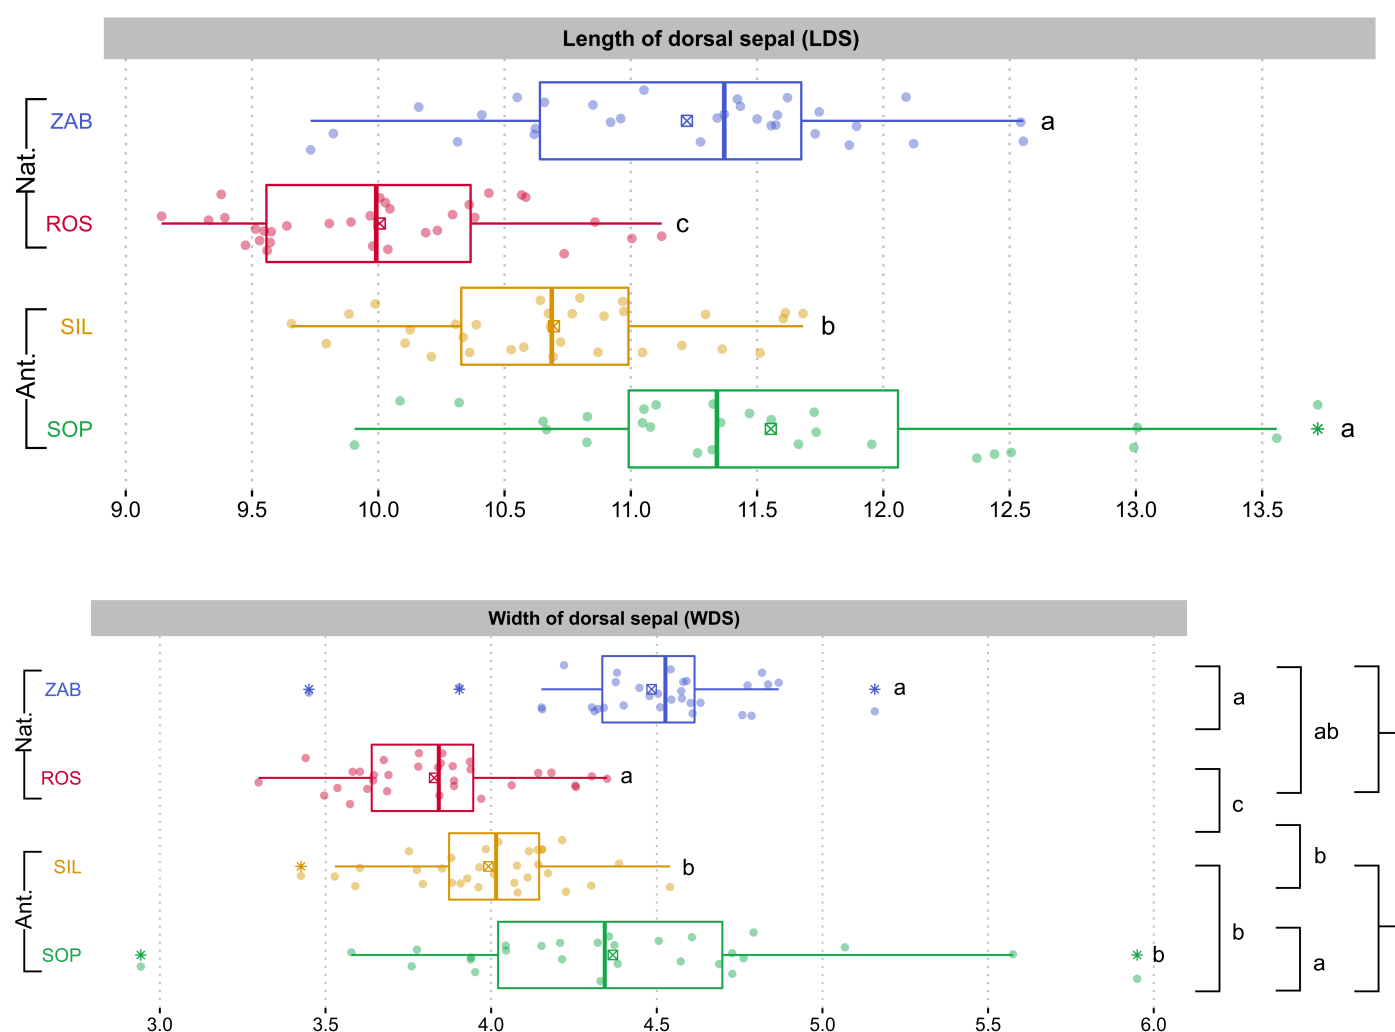

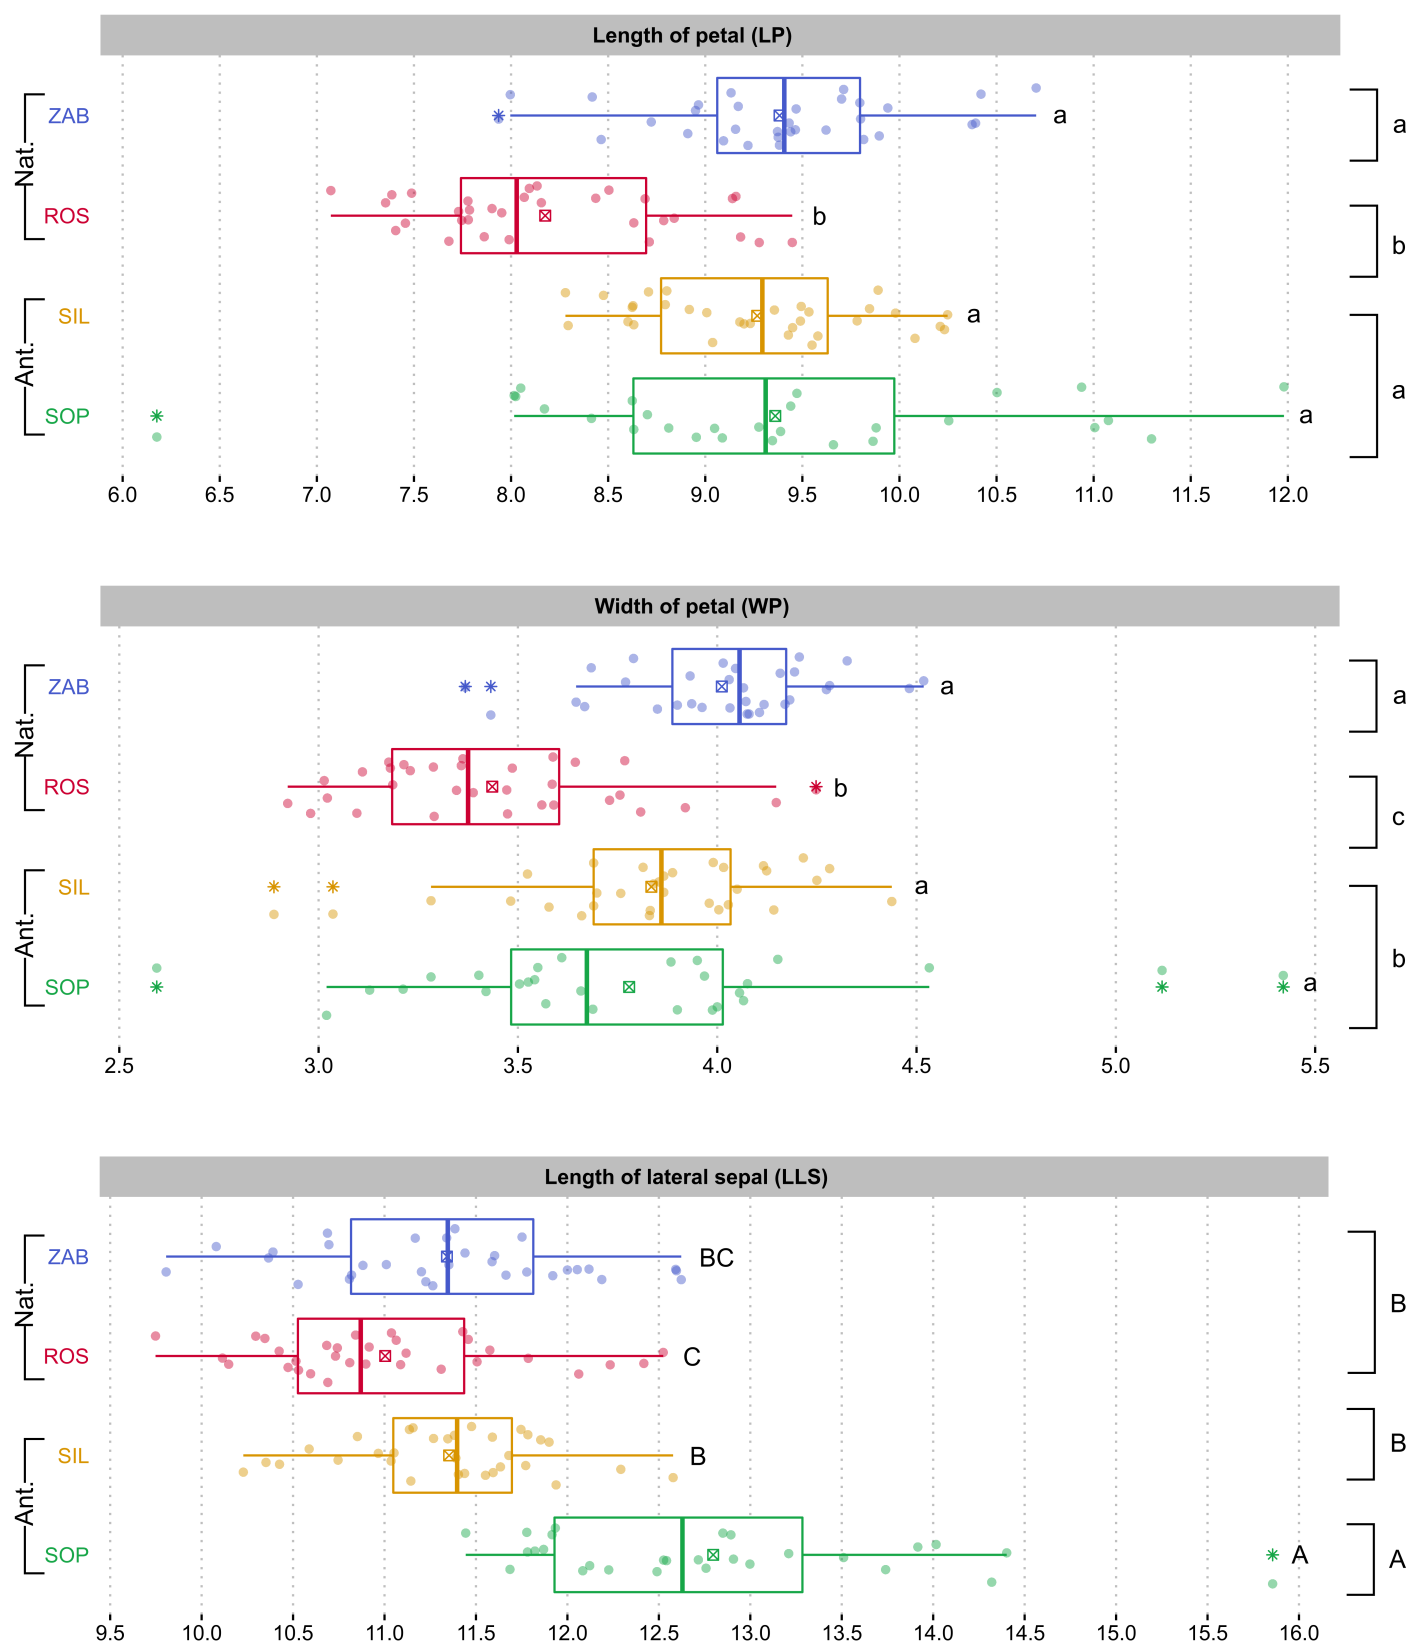

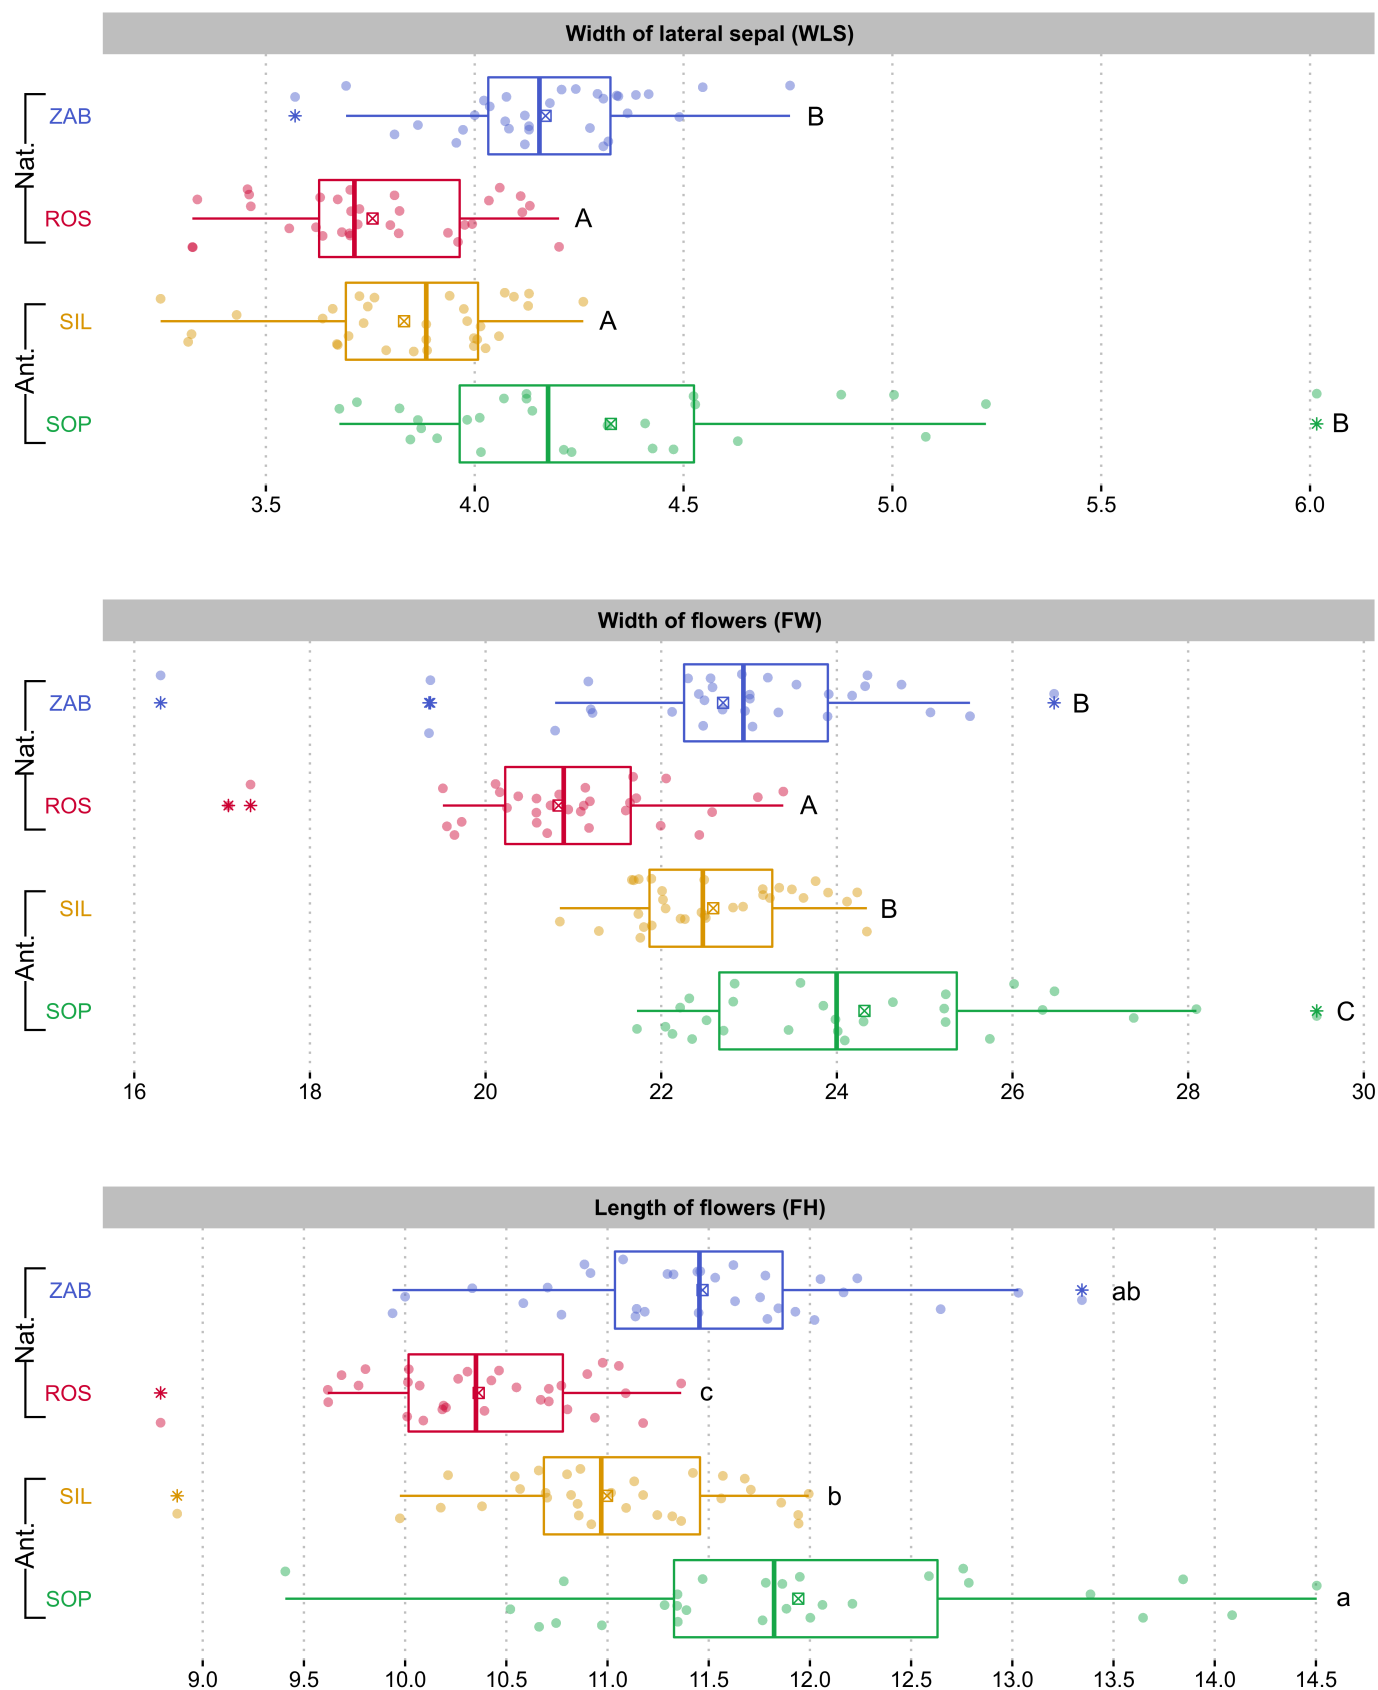

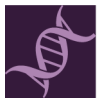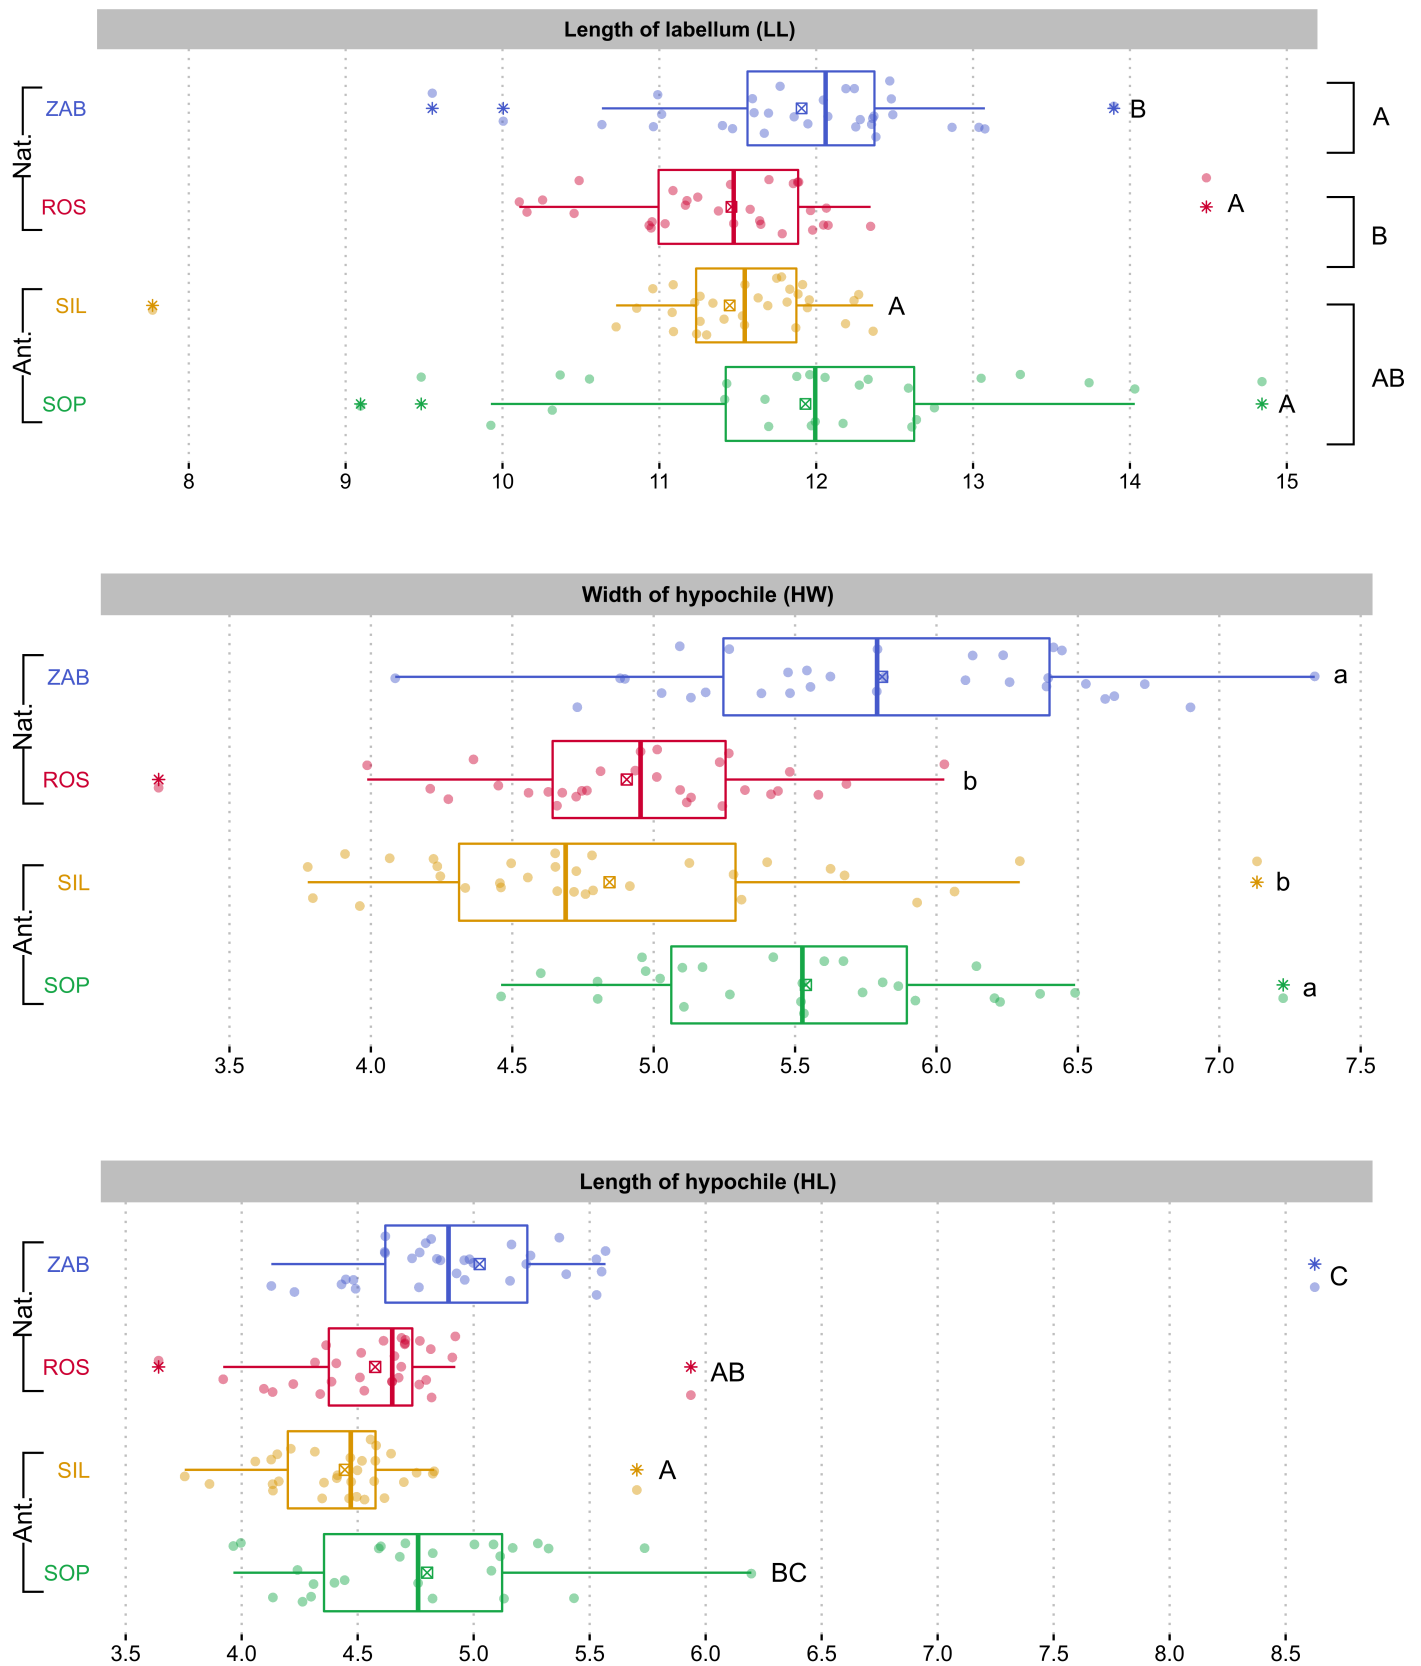



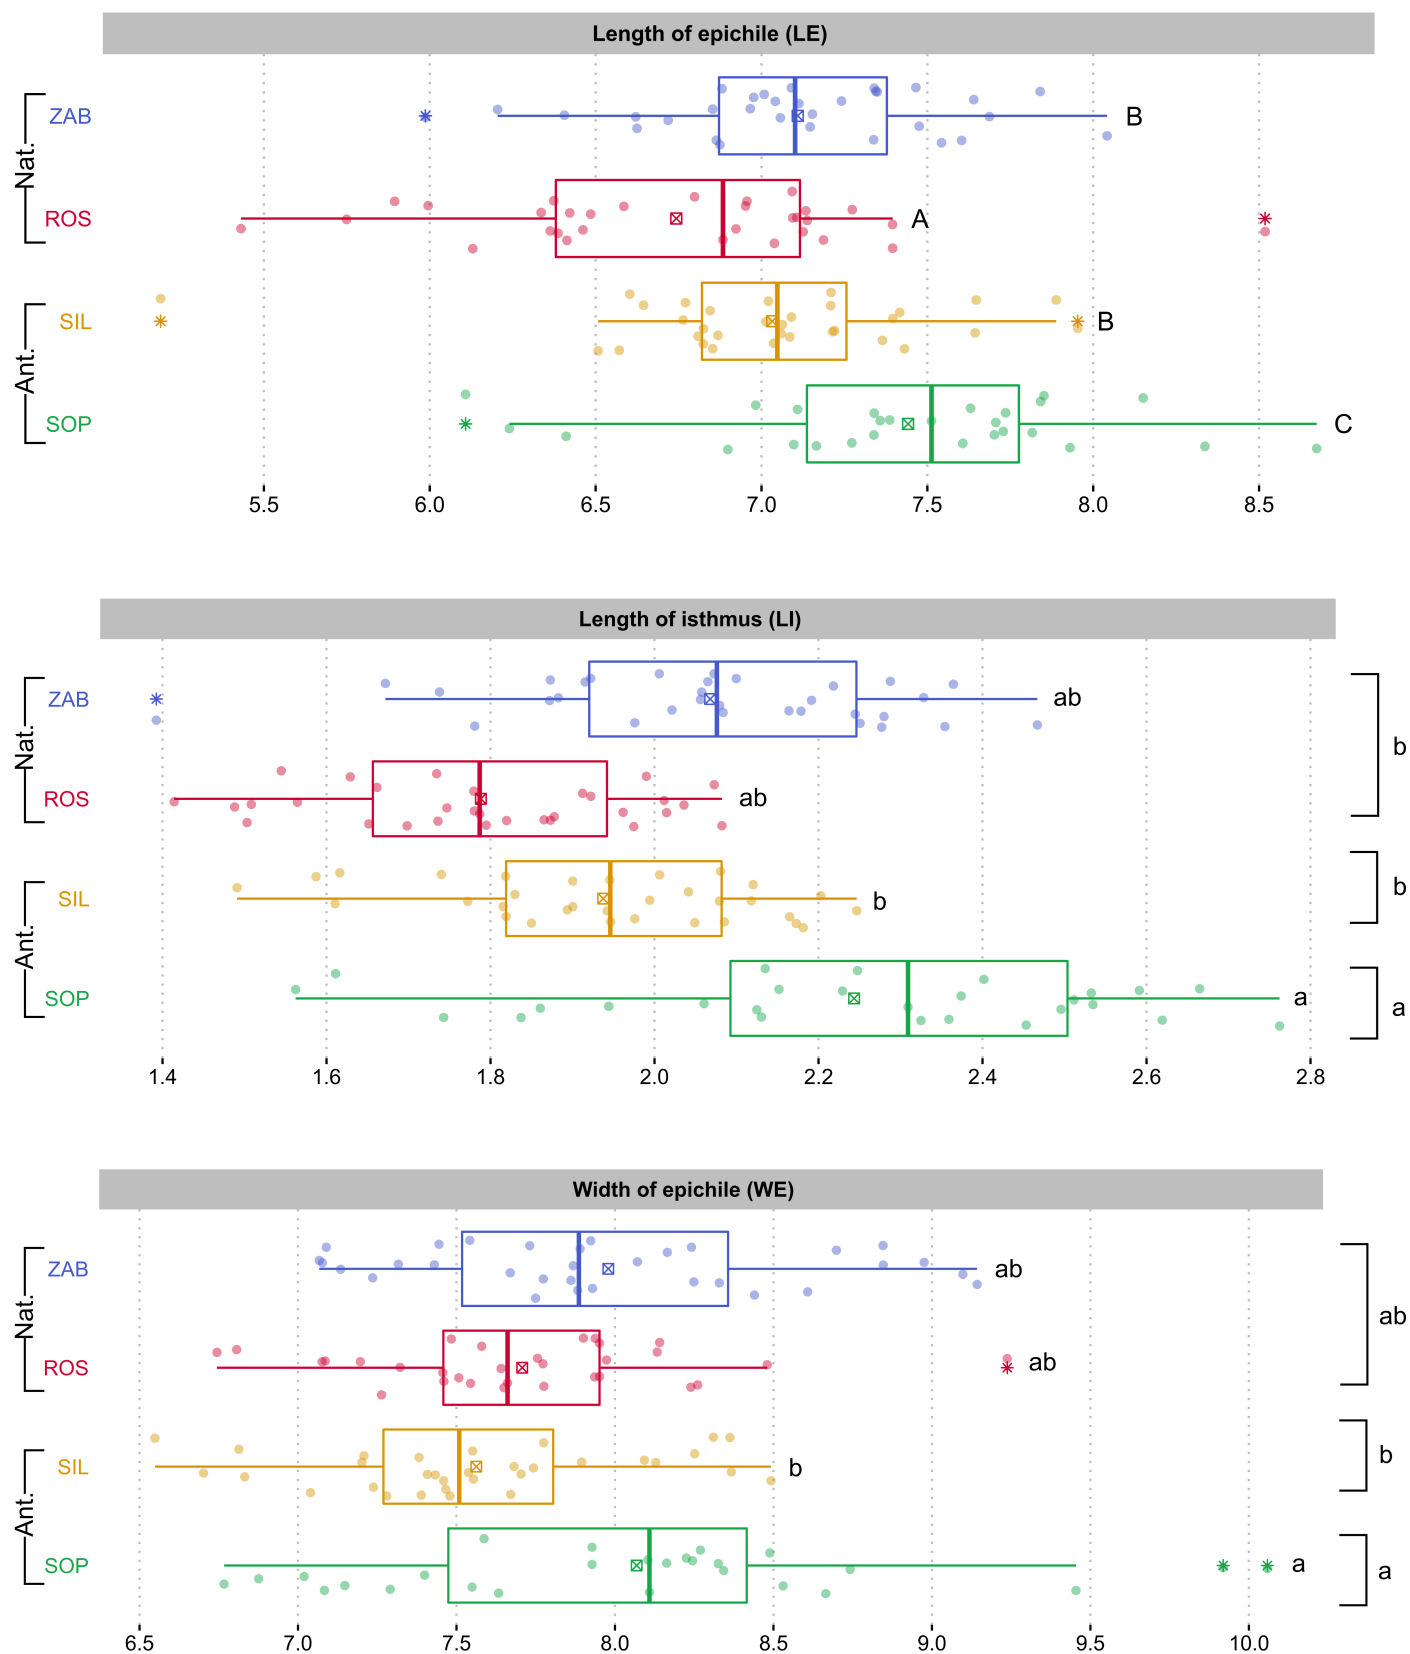

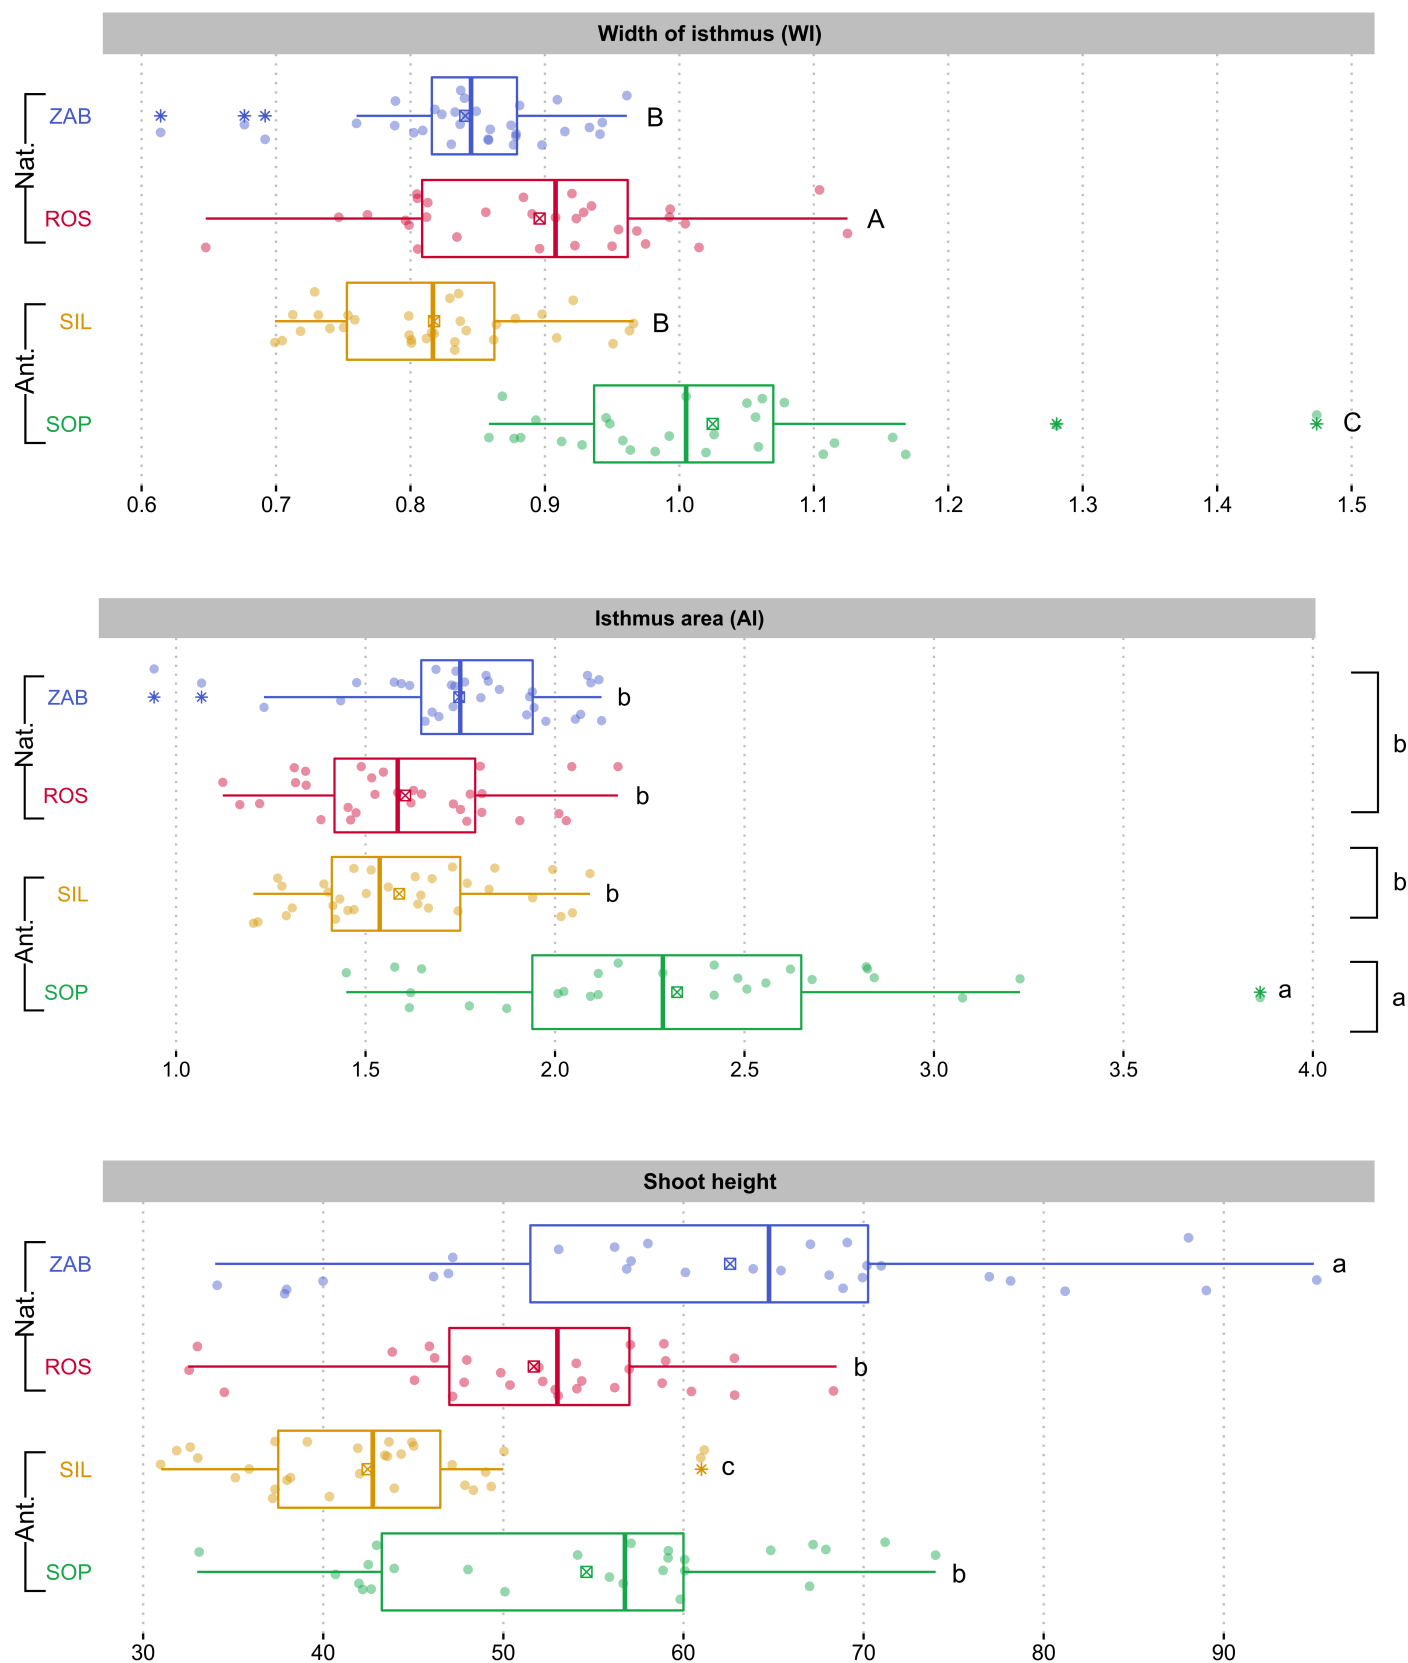

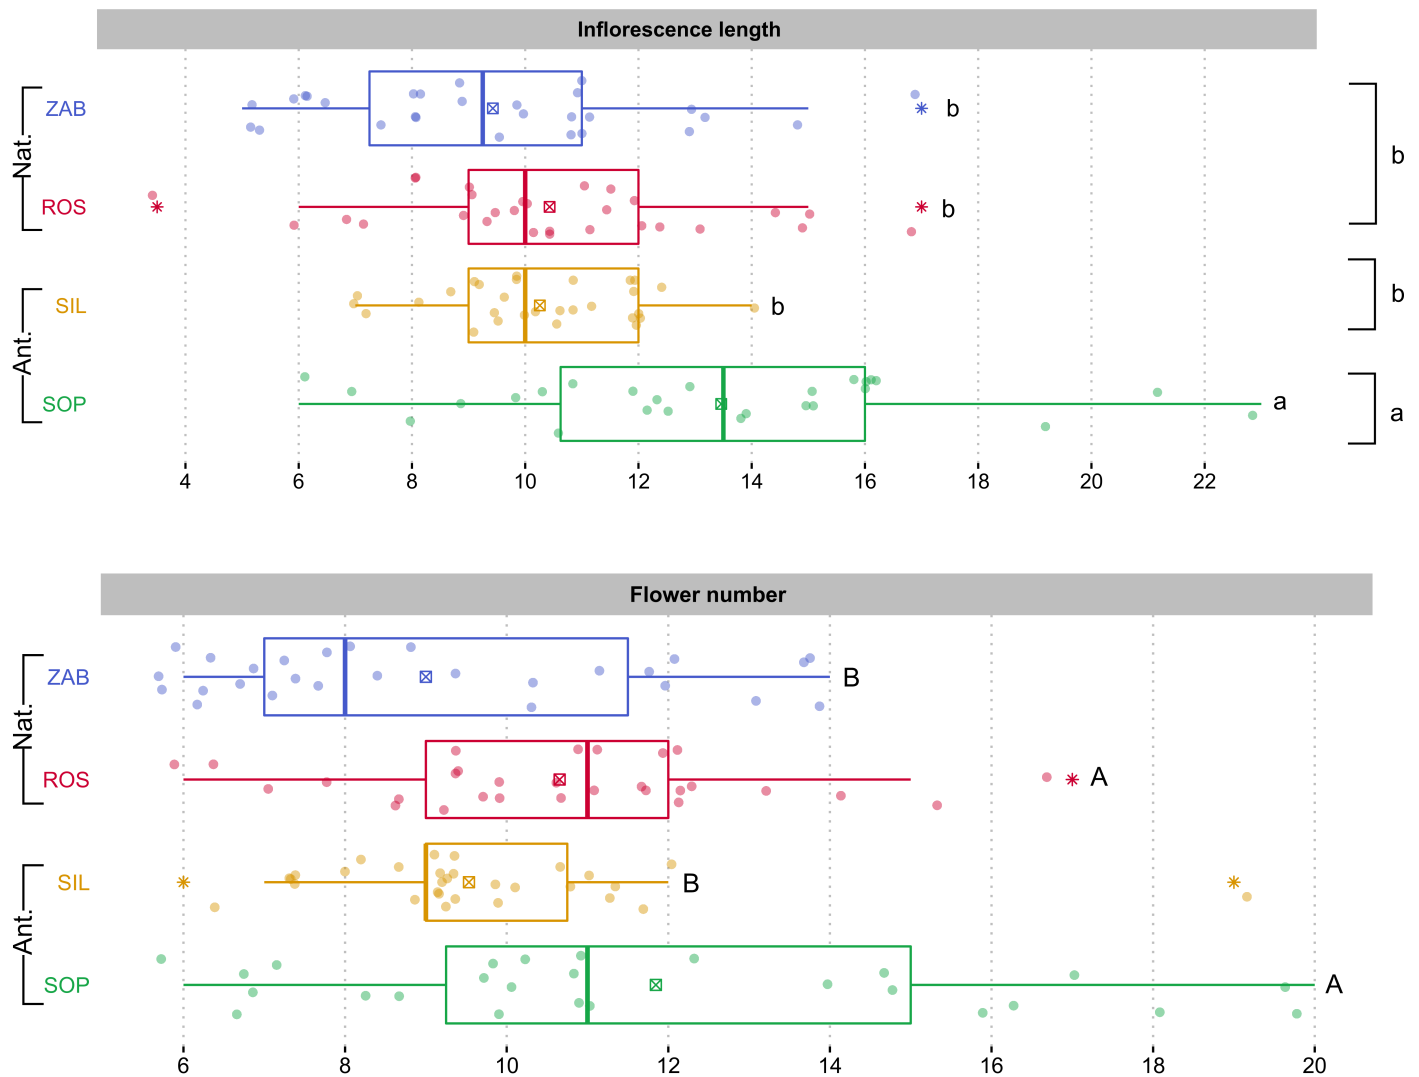



Percentage of explained variance Cumulative percentage of explained variance

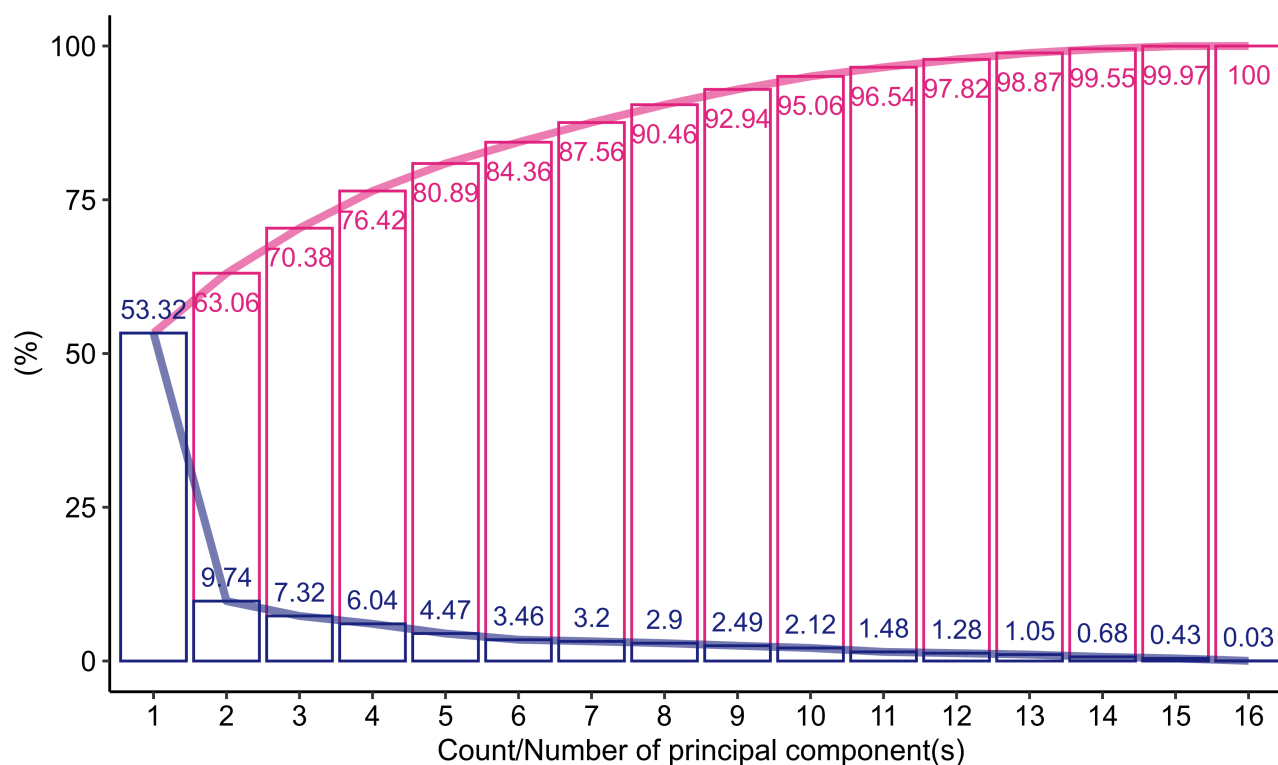

**Figure S2.** Scree plot showing the proportion of explained variance by the principal components of flower structure PCA model.

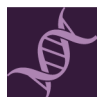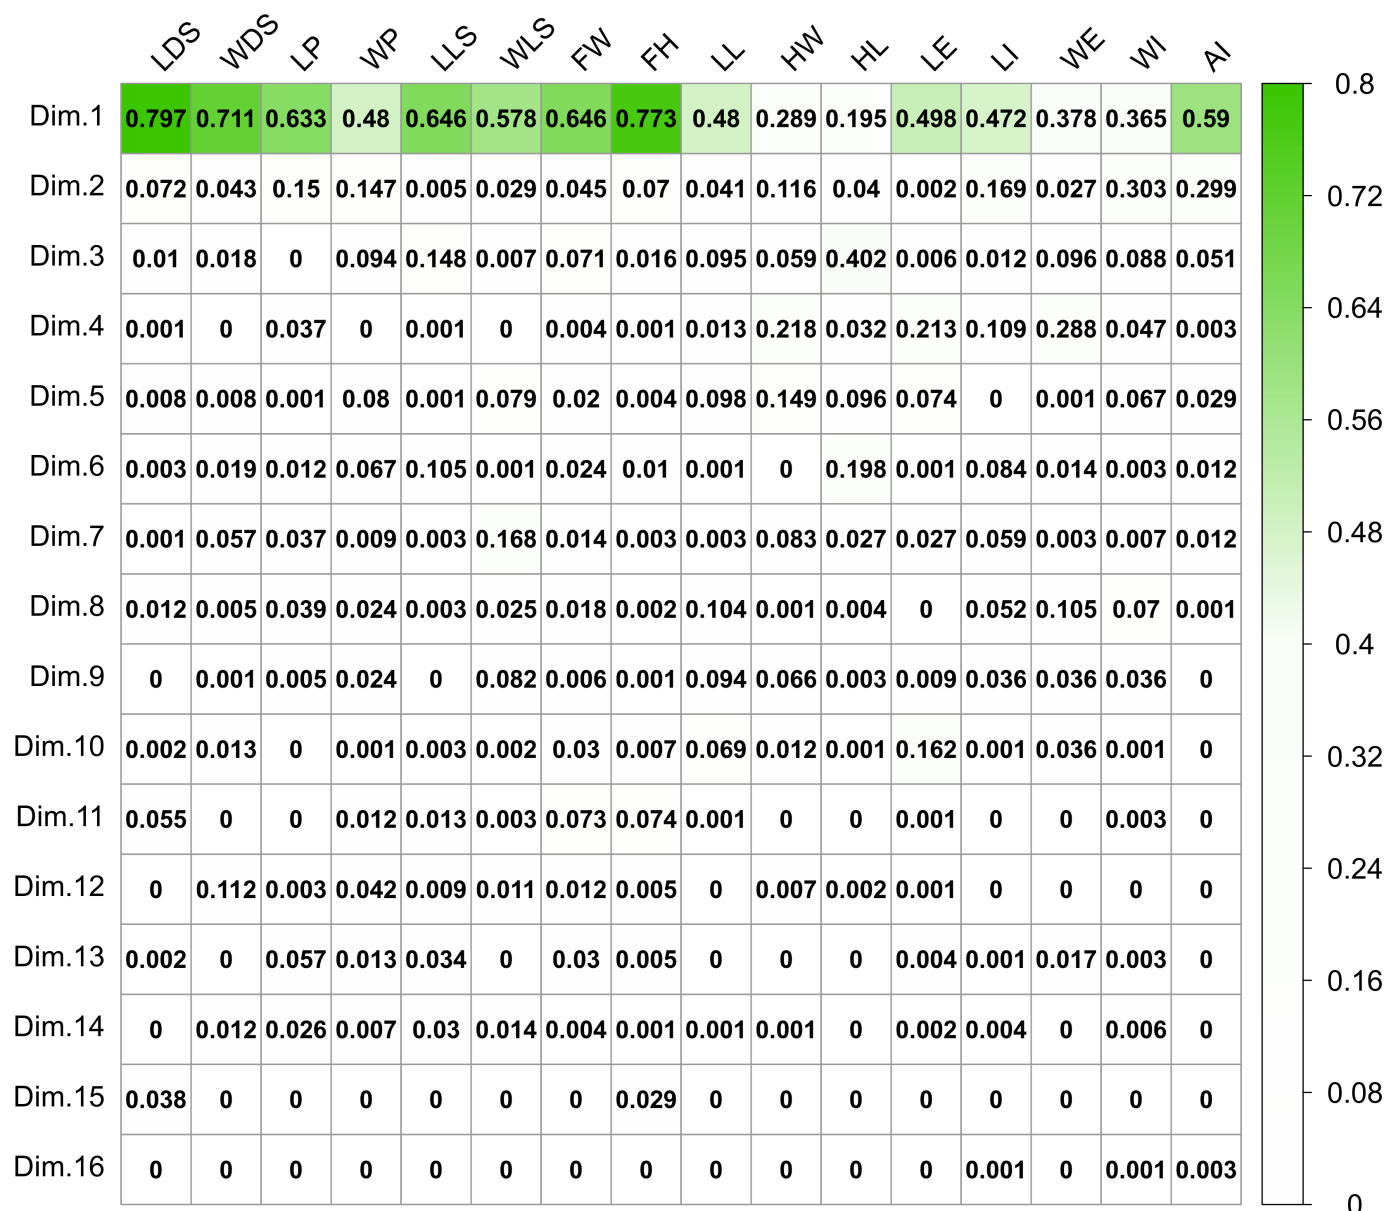

**Figure S3.**  $\text{Cos}^2$  for the flower structure parameters selected as active variables in the principal component analysis model, representing the quality of representation for variables on the factor map (Dim1-16).



**Figure S4.** Boxplots of amino acids amounts for *Epipactis palustris* natural (Nat.) and anthropogenic (Ant.) populations (n = 30). Colored dots are individual samples. The crossed square shows the mean. The lower and upper hinges correspond to the lower ( $Q_1$ ) and upper ( $Q_3$ ) quartiles. Thus box length shows the interquartile range (IQR). The thicker line inside boxes corresponds to the median. The lower whisker extends from the hinge to the smallest value at most  $Q_1 - 1.5 \times \text{IQR}$  of the hinge. The upper whisker extends from the hinge to the largest value no further than  $Q_3 + 1.5 \times \text{IQR}$ . Data beyond the end of the whiskers, indicated with an asterisk symbol, are outliers. Different lowercase letters indicate statistically significant differences according to Tukey's post-hoc test ( $p < 0.05$ ). Different uppercase letters indicate statistically significant differences according to the pairwise Wilcoxon Rank Sum test with Benjamini-Hochberg adjustment ( $p < 0.05$ ). Symbol '≠' means 'differ significantly'. Additional comparisons on the right side were shown only when populations within Nat. and/or Ant. do not differ significantly.

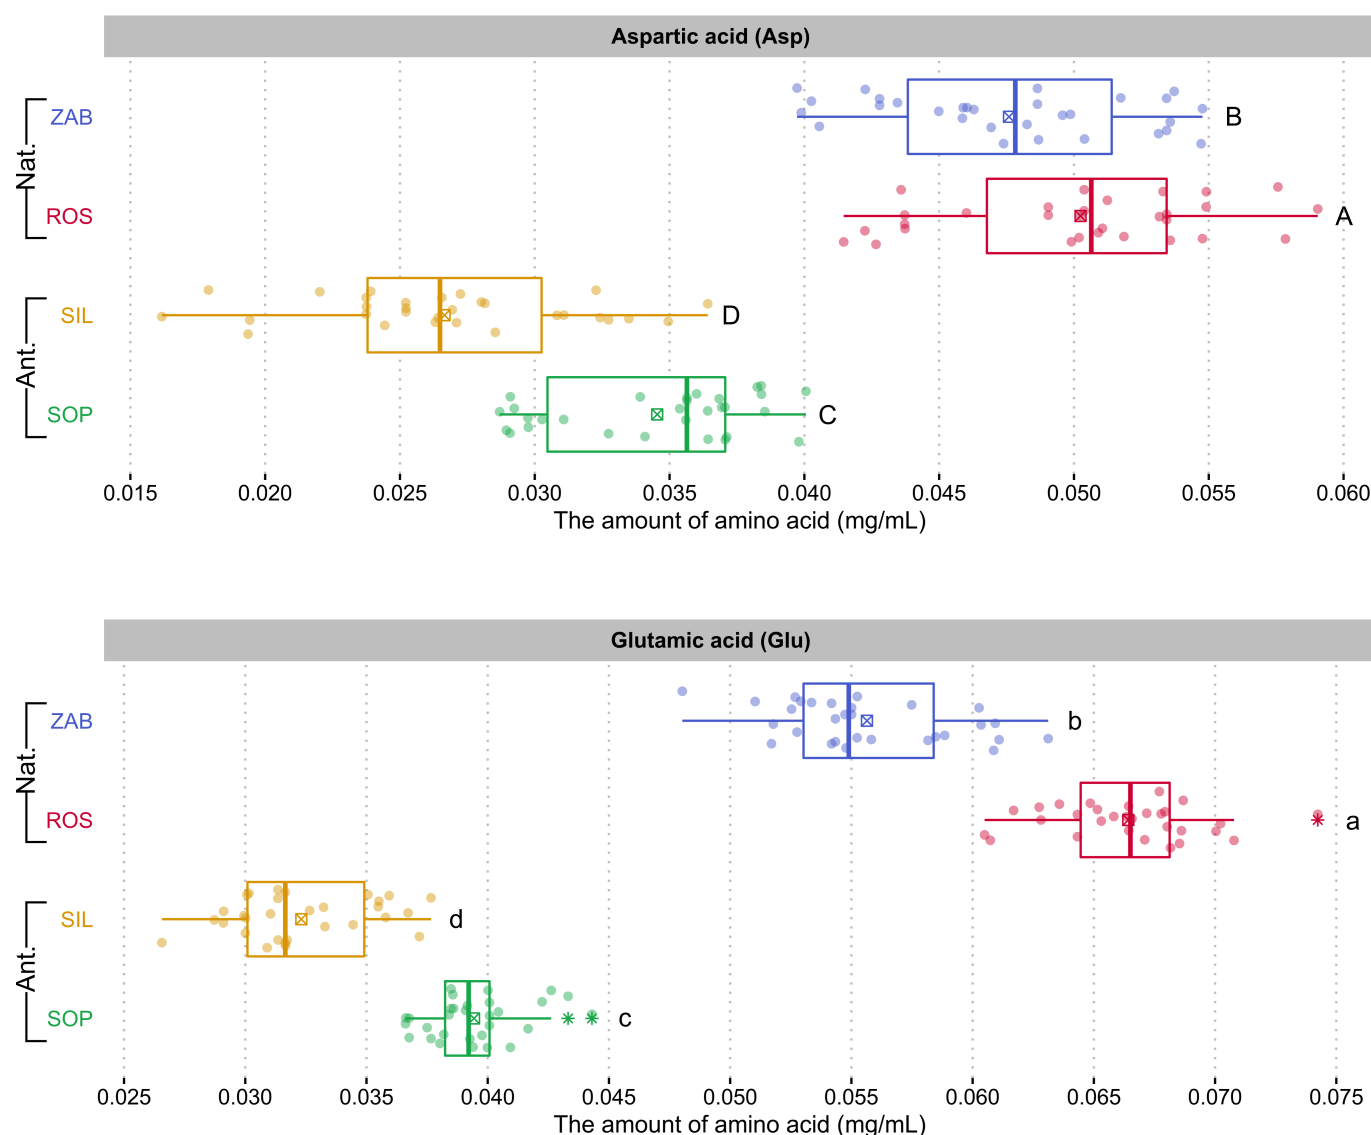

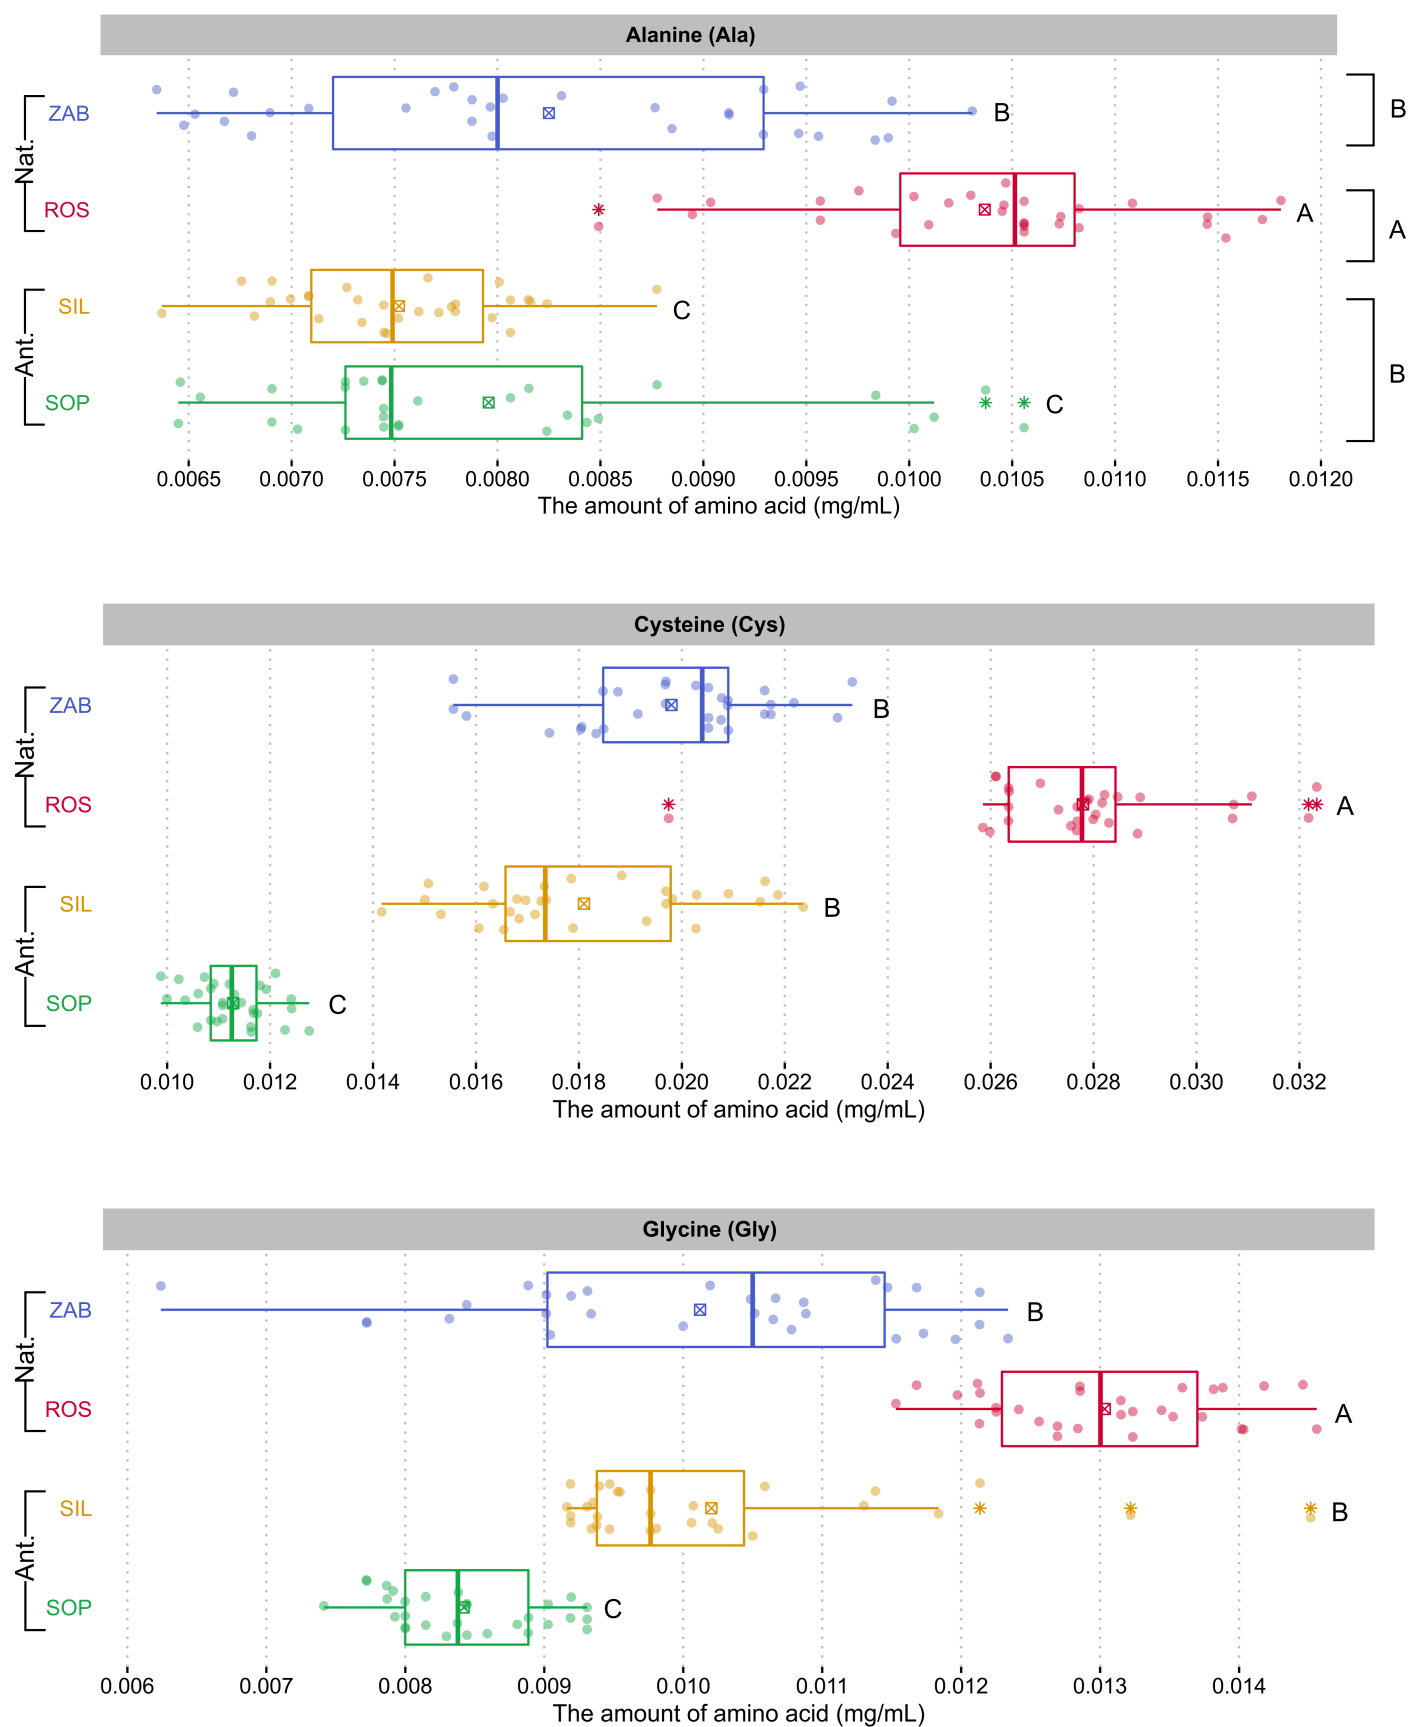

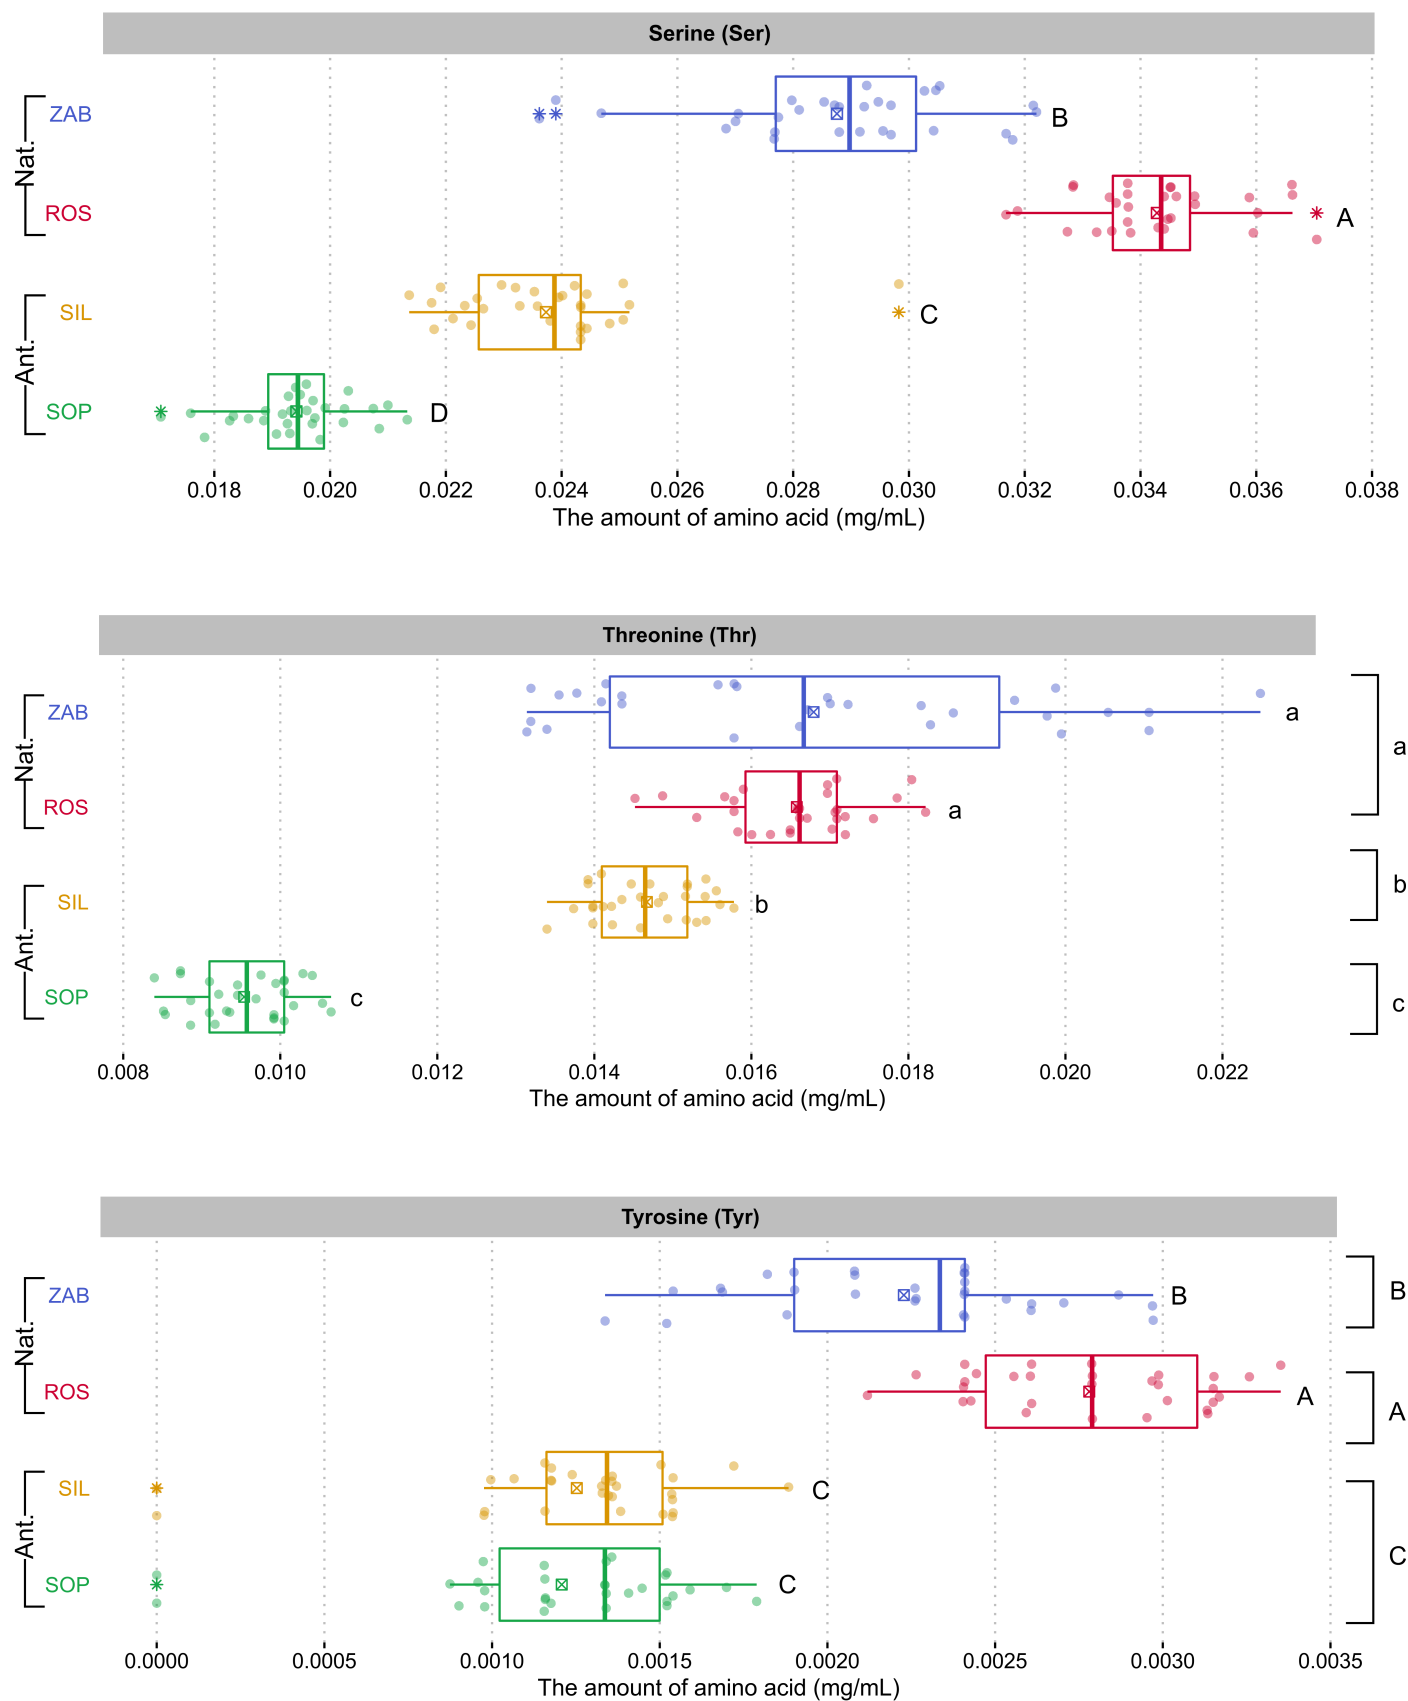



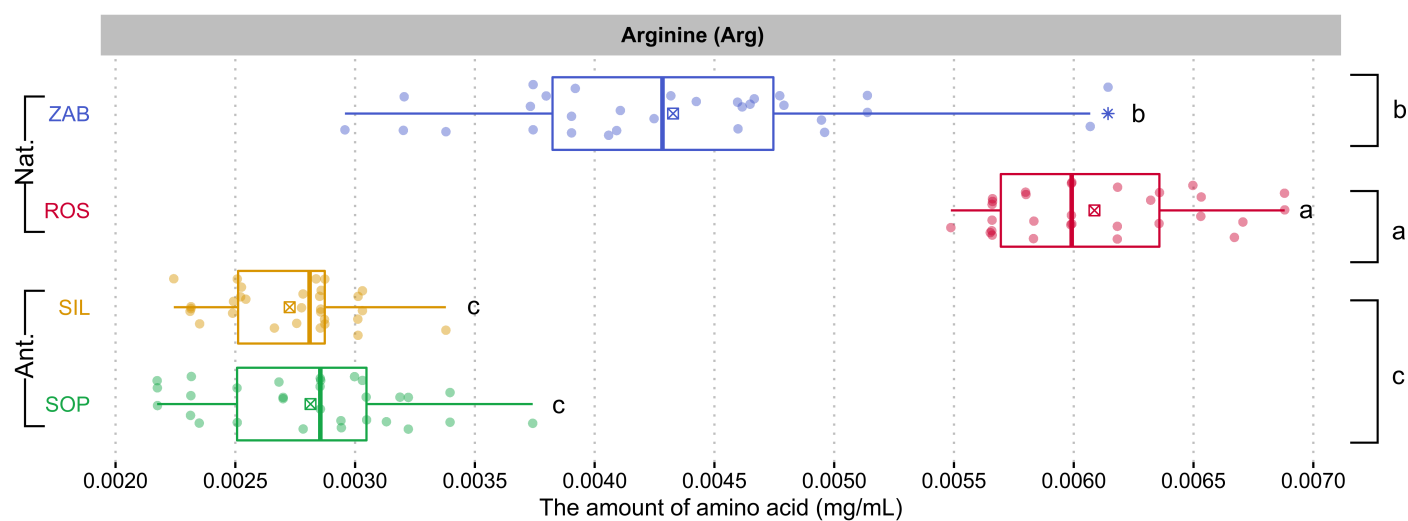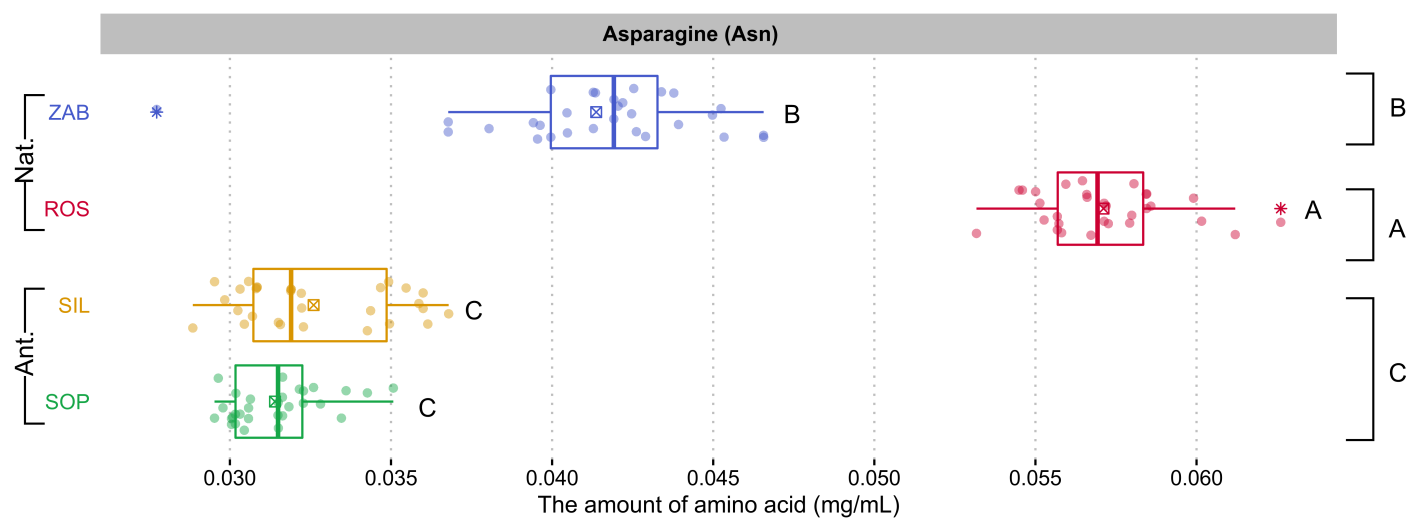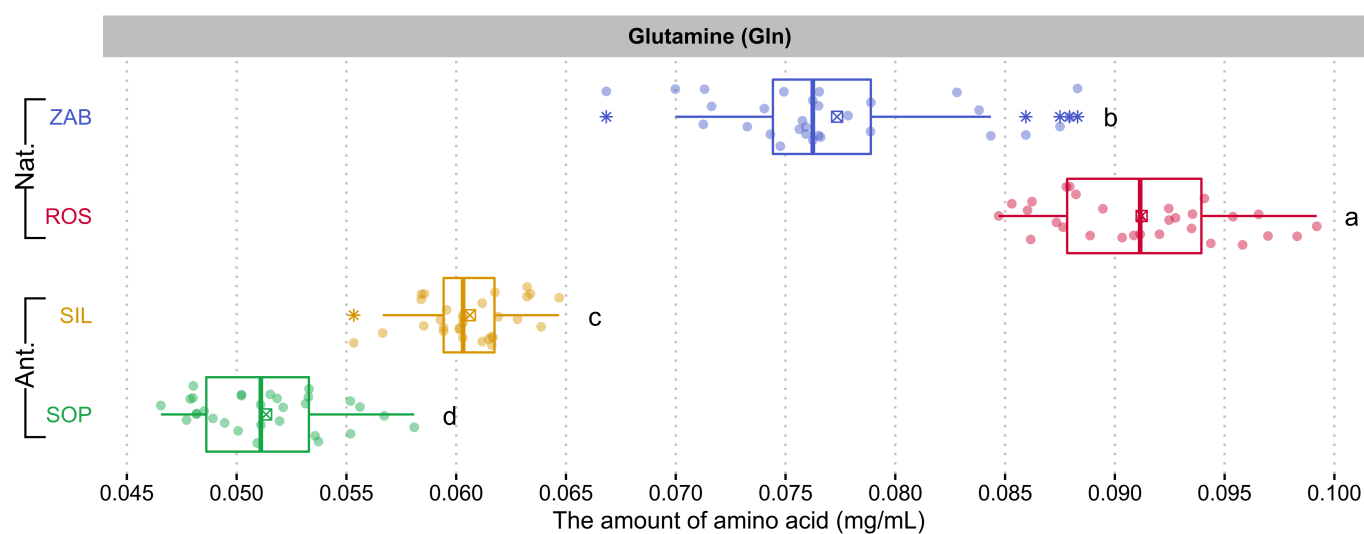

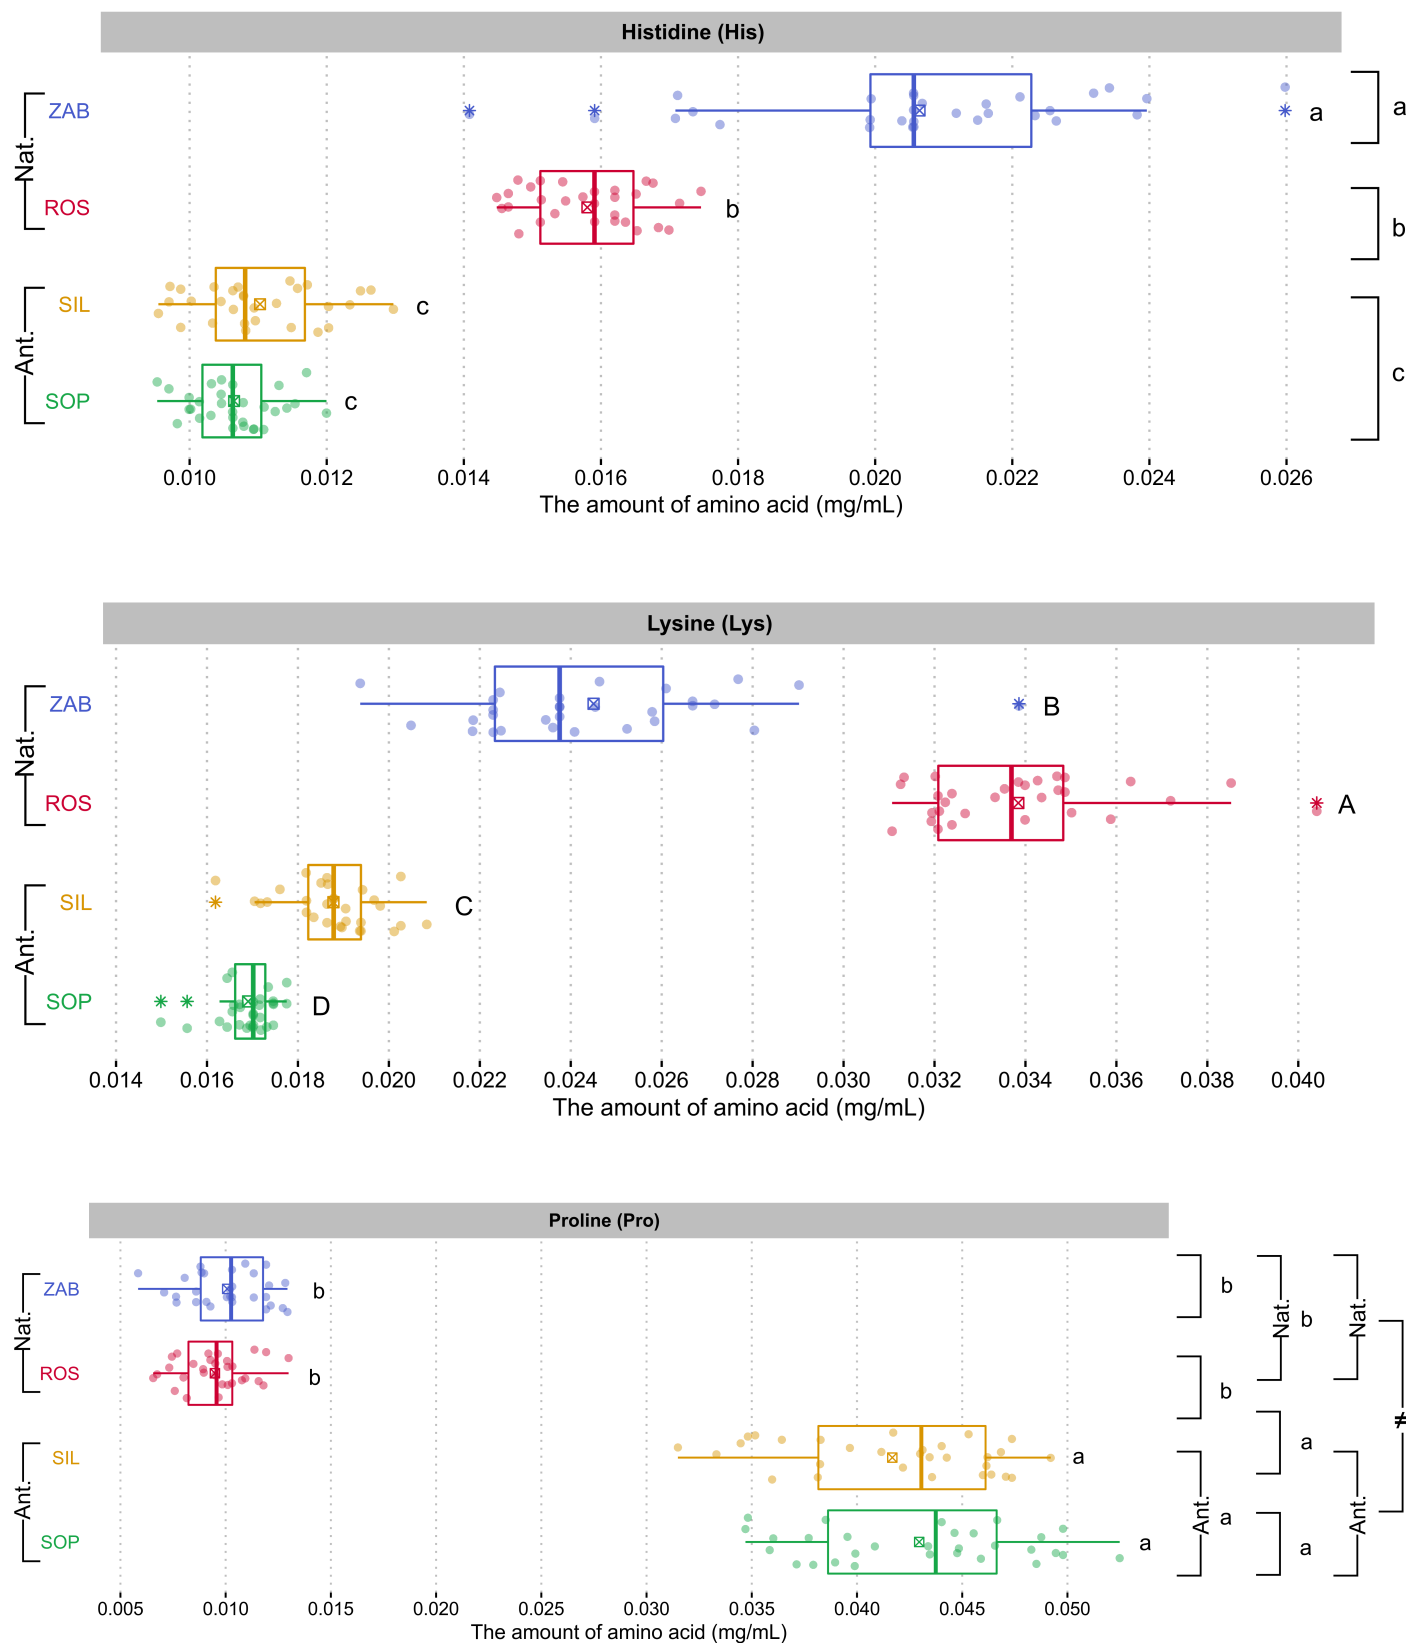

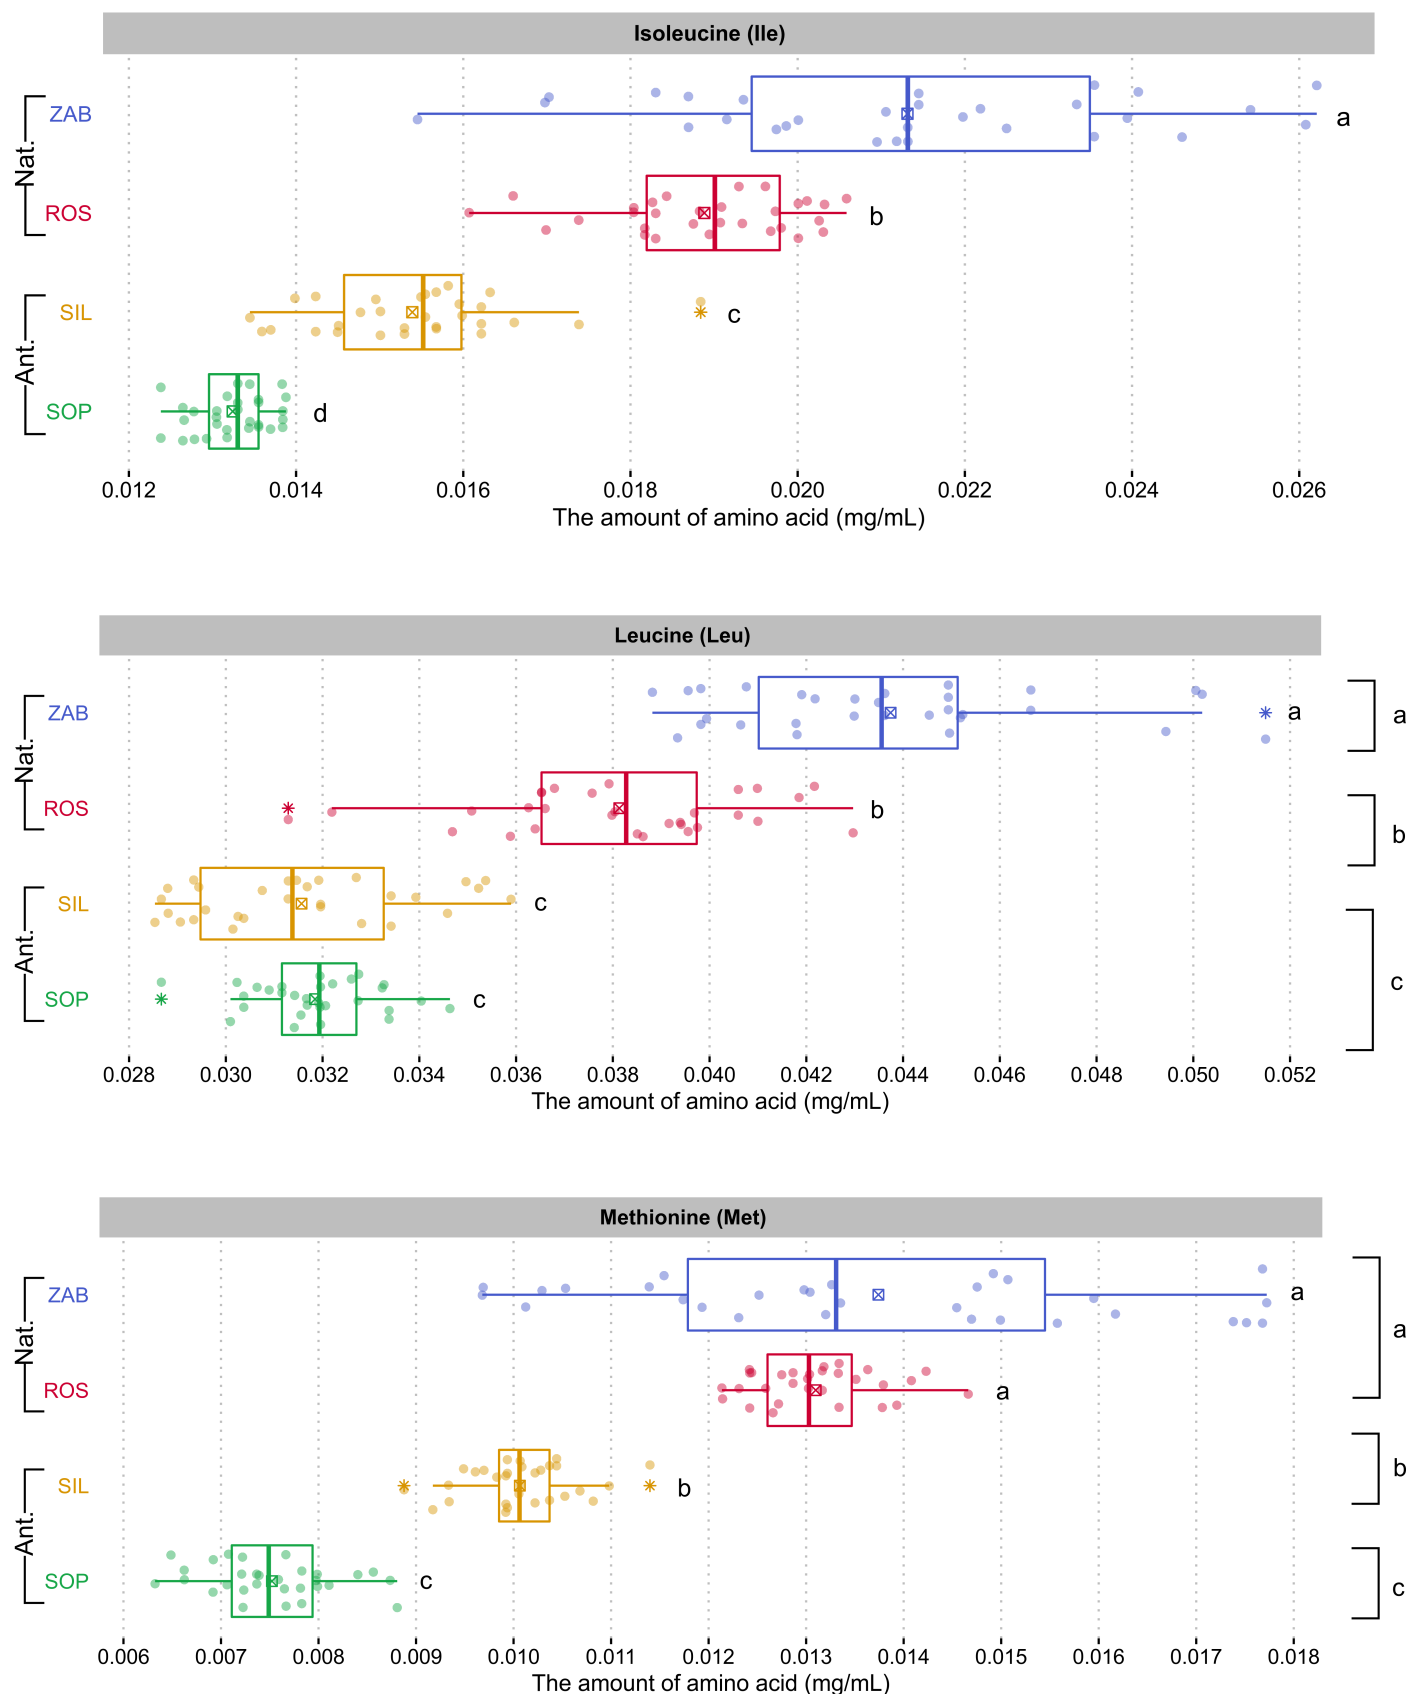

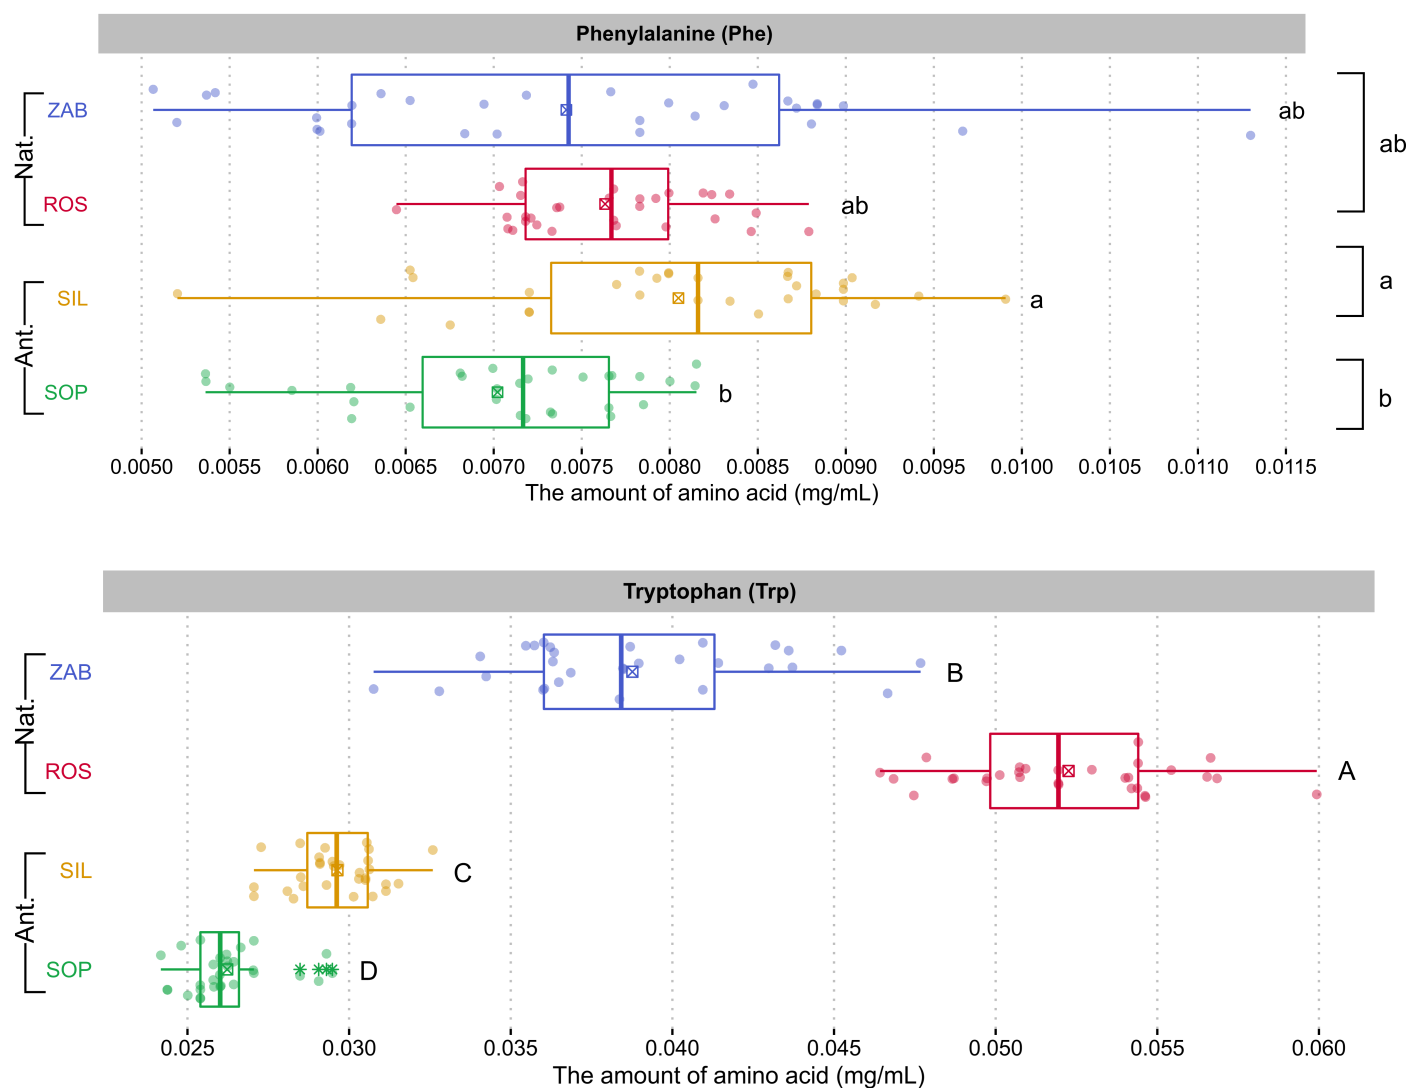

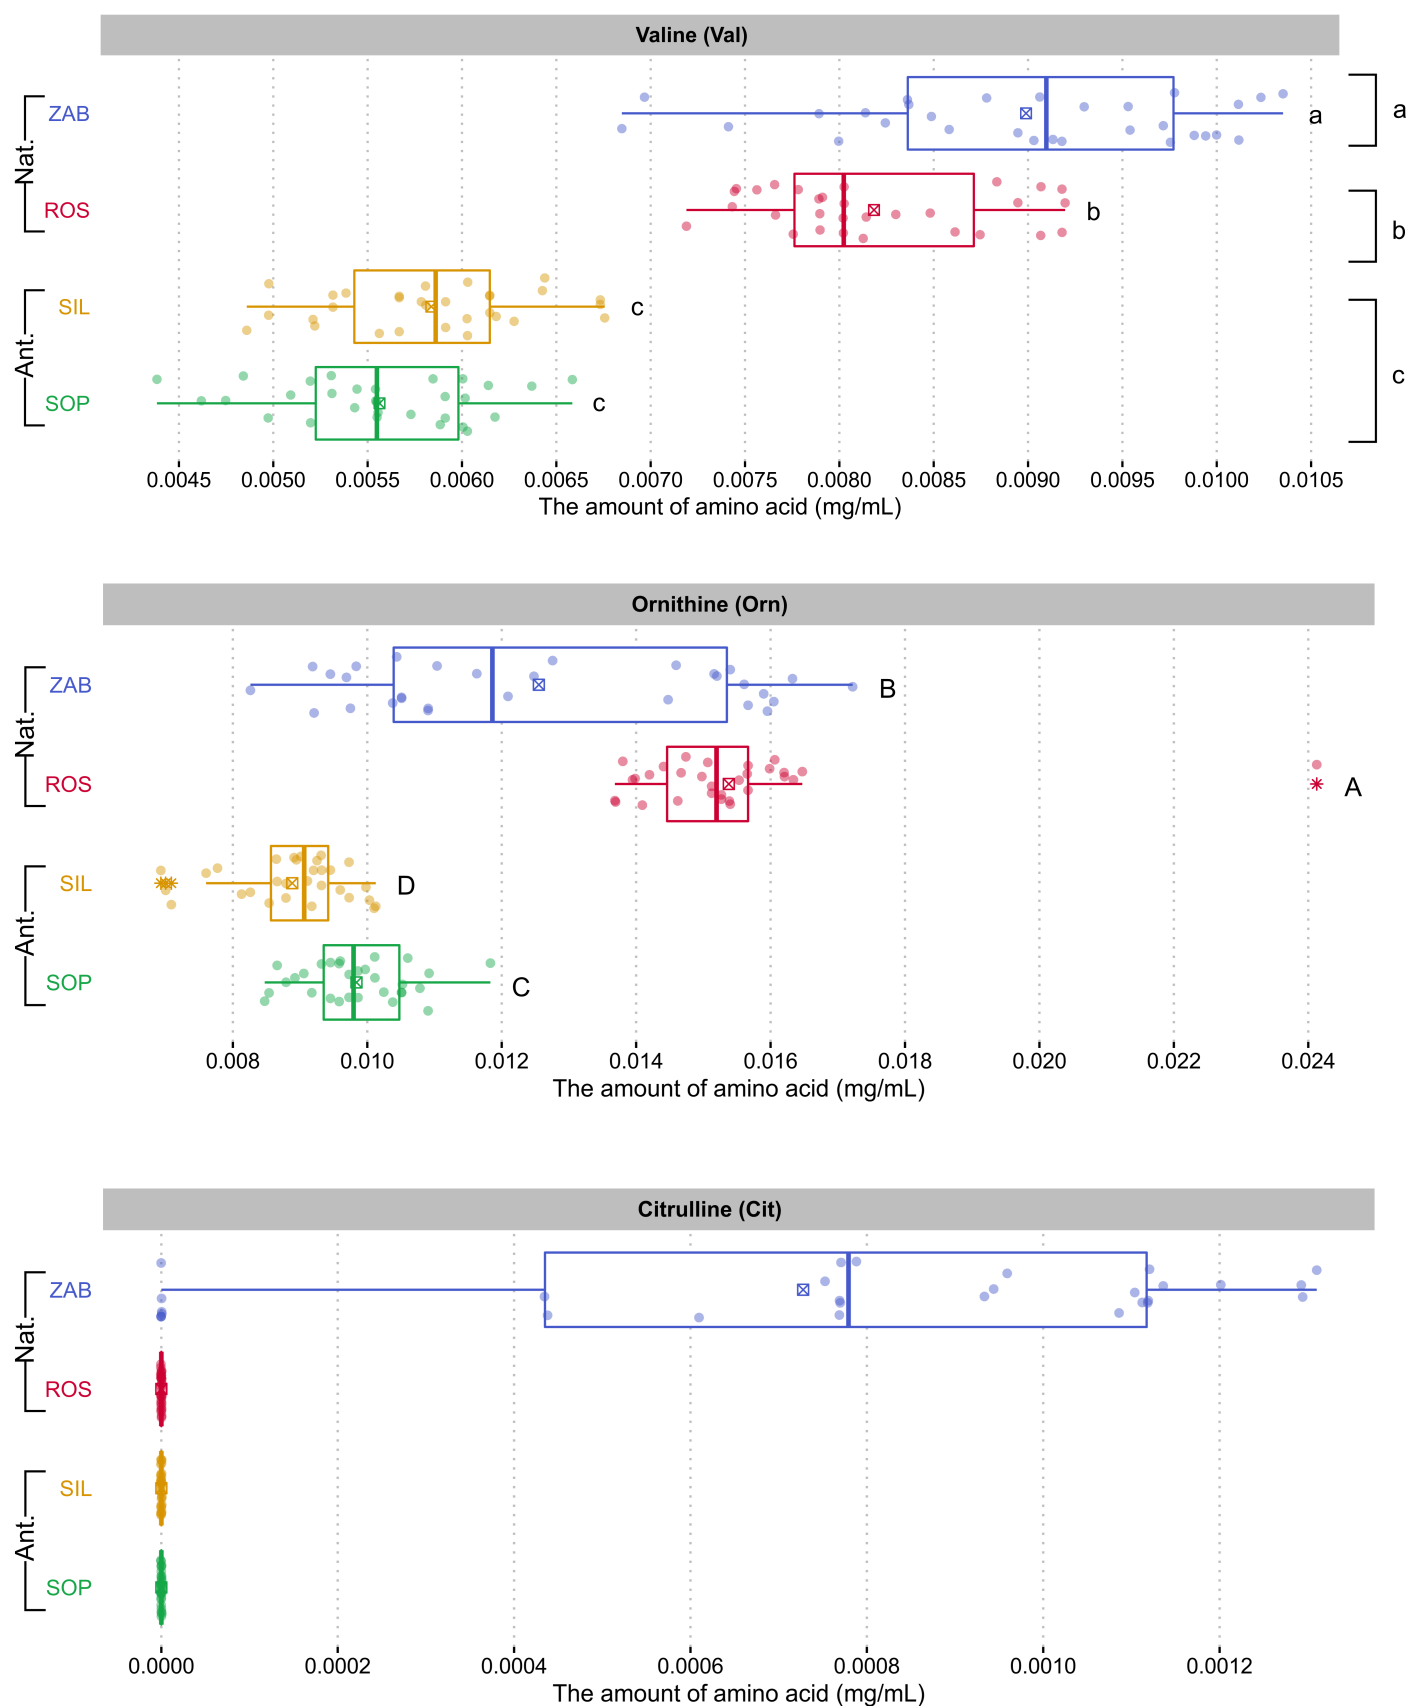

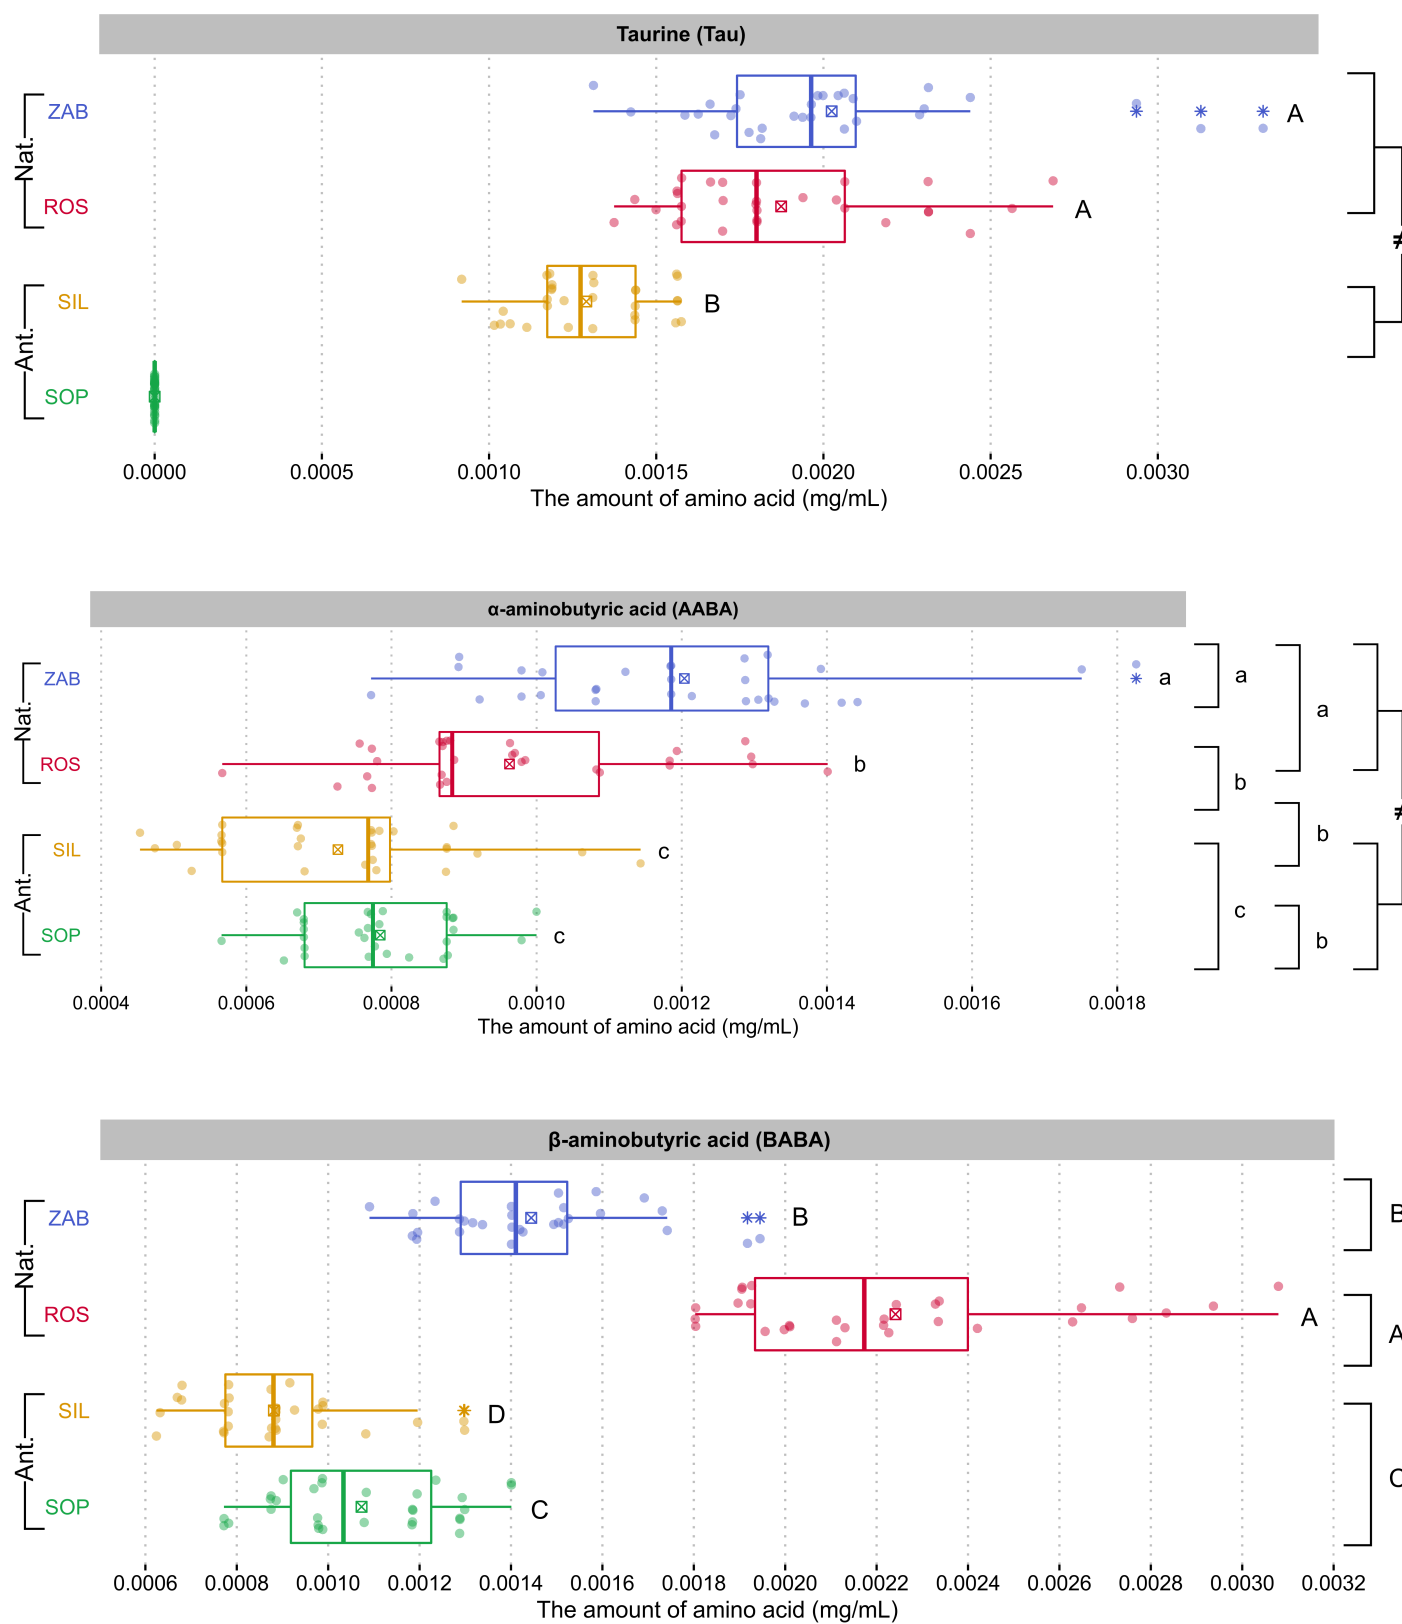

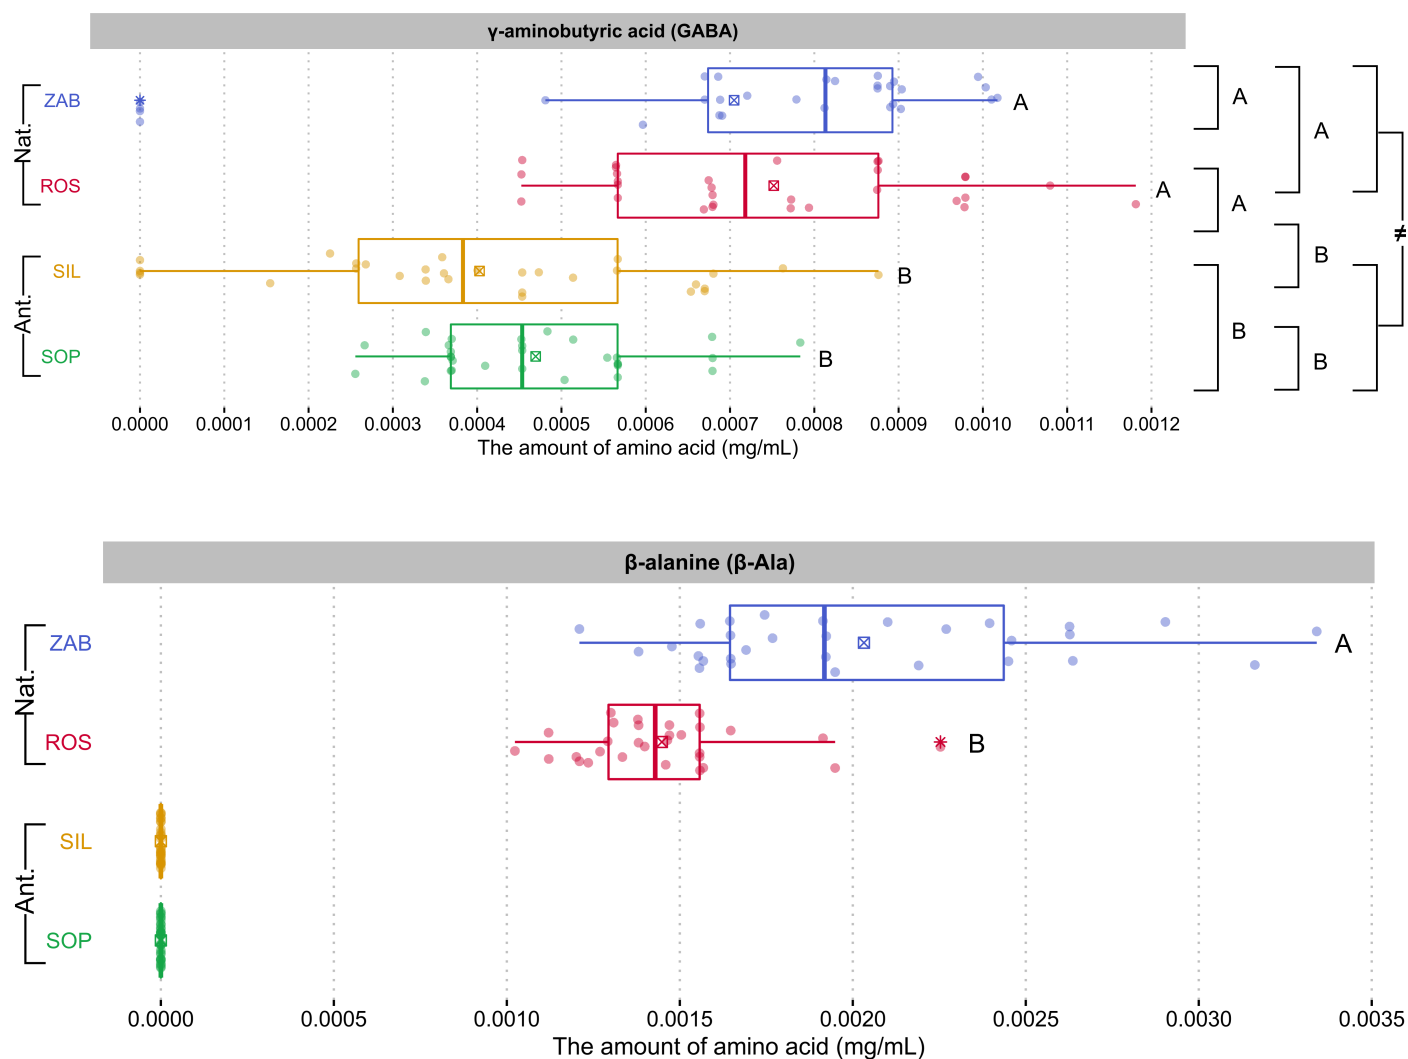

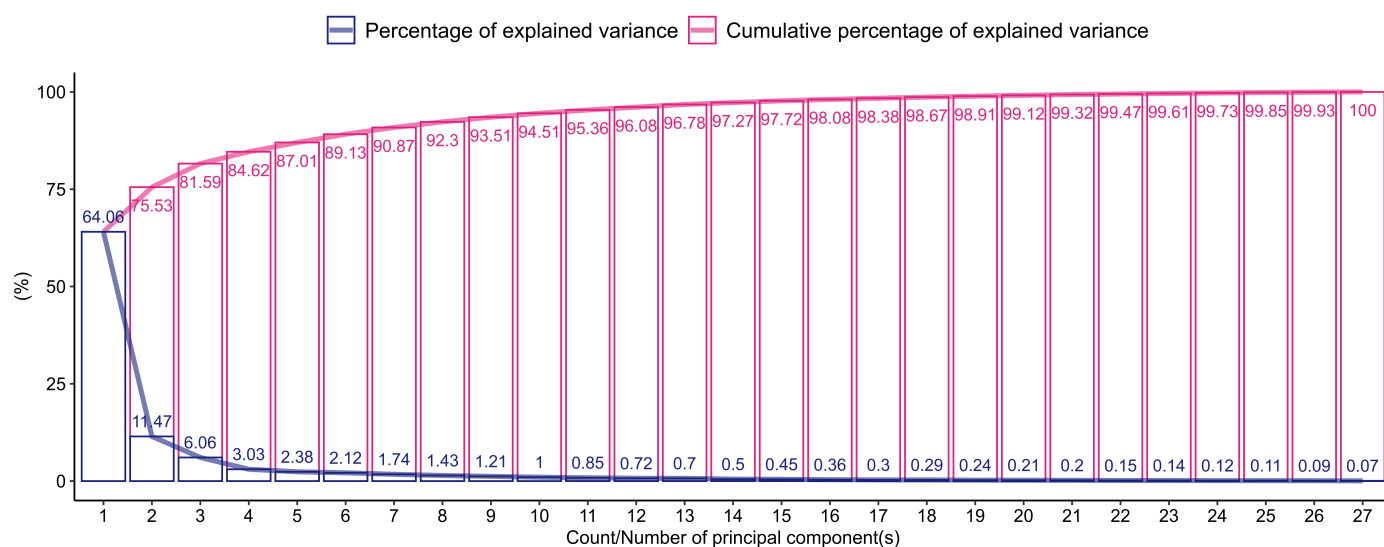

**Figure S5.** Scree plot showing the proportion of explained variance by the principal components of amino acids PCA model.



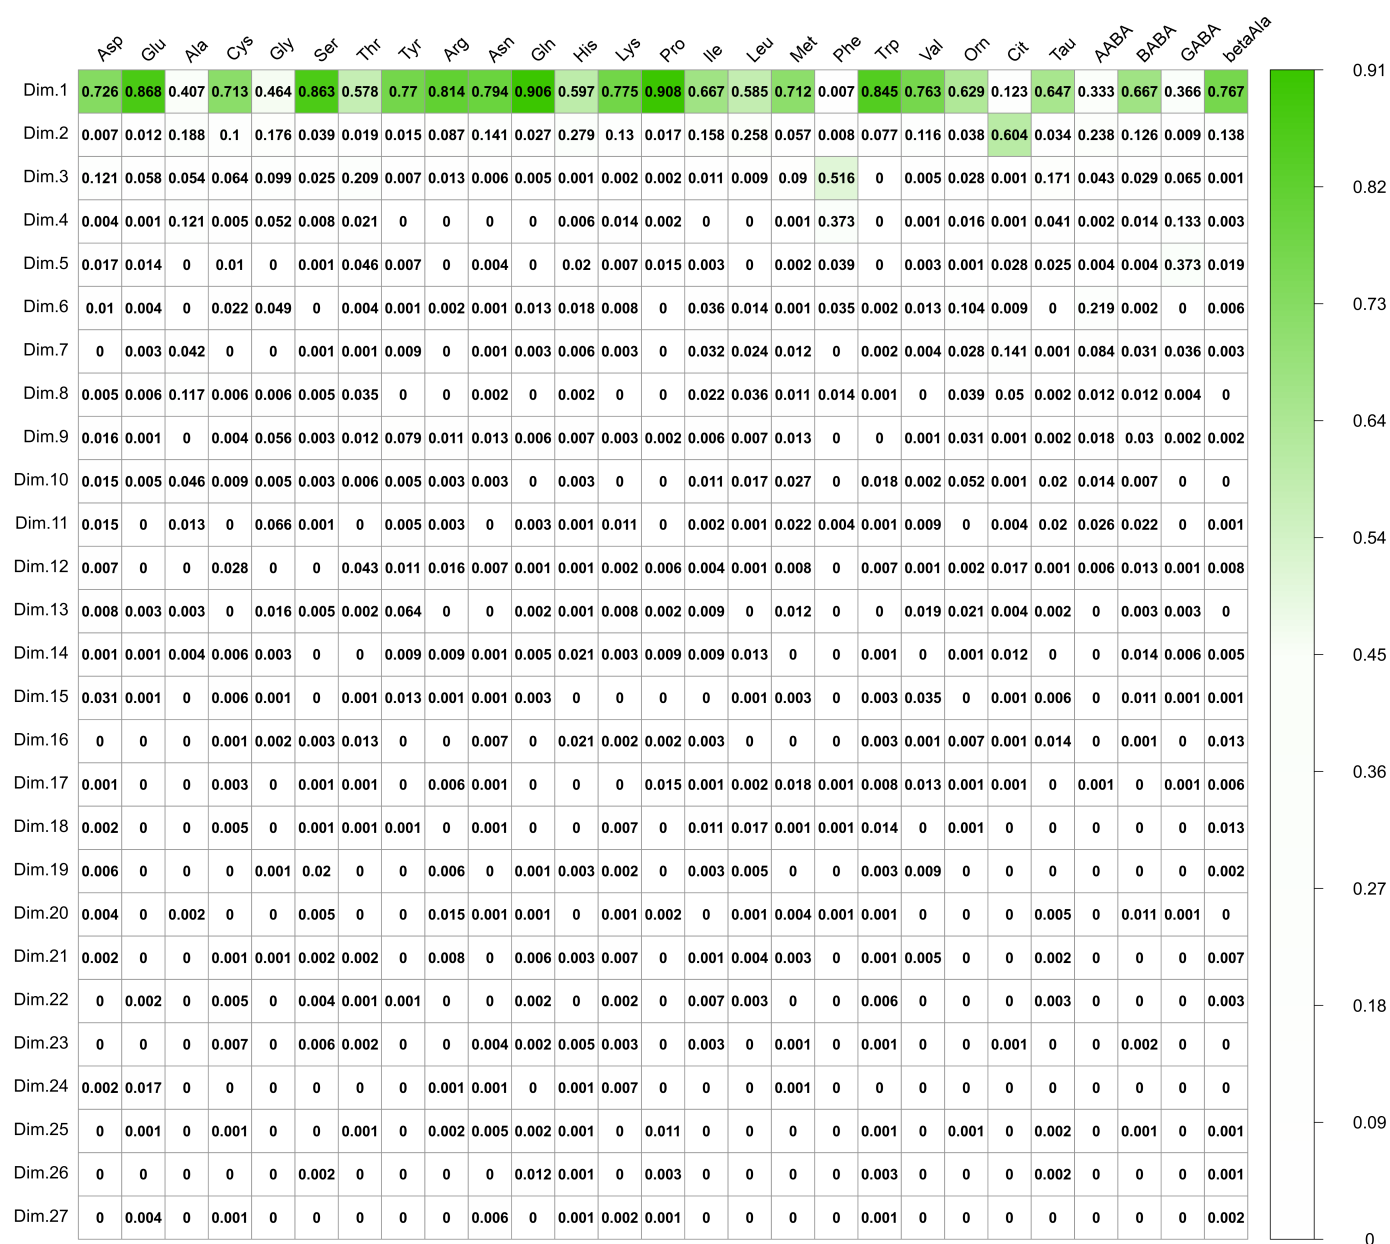

**Figure S6.** Cos<sup>2</sup> for the amino acids selected as active variables in the principal component analysis model, representing the quality of representation for variables on the factor map (Dim1-27).



**Table S1.** *P*-values for different tests on floral display and flower structure datasets ( $n = 30$ ). M1 – Two-way ANOVA with Tukey’s post-hoc test. M2 – Kruskal-Wallis rank sum test with Wilcoxon rank sum test with Benjamini-Hochberg *p*-value correction. Blank cell for *p*-value  $> 0.05$ ; \* for *p*-value  $\leq 0.05$ ; \*\* for *p*-value  $\leq 0.01$ ; \*\*\* for *p*-value  $\leq 0.001$ . The symbol (-) indicates that the statistical test or M1/M2 analysis could not be performed.

| Parameter                     | Shapiro-Wilk test |     |     |     | Bartlett's test | F test | Welch's F test | Kruskal-Wallis test | Analysis |
|-------------------------------|-------------------|-----|-----|-----|-----------------|--------|----------------|---------------------|----------|
|                               | ZAB               | ROS | SIL | SOP |                 |        |                |                     |          |
| Length of dorsal sepal (LDS)  |                   |     |     |     | **              | ***    | ***            | ***                 | M1       |
| Width of dorsal sepal (WDS)   |                   |     |     |     | ***             | ***    | ***            | ***                 | M1       |
| Length of petal (LP)          |                   |     |     |     | ***             | ***    | ***            | ***                 | M1       |
| Width of petal (WP)           |                   |     |     |     | ***             | ***    | ***            | ***                 | M1       |
| Length of lateral sepal (LLS) |                   |     |     | *   | **              | -      | -              | ***                 | M2       |
| Width of lateral sepal (WLS)  |                   |     |     | **  | ***             | -      | -              | ***                 | M2       |
| Width of flowers (FW)         | **                |     |     |     | ***             | -      | -              | ***                 | M2       |
| Length of flowers (FH)        |                   |     |     |     | ***             | ***    | ***            | ***                 | M1       |
| Length of labellum (LL)       |                   | **  | *** |     | *               | -      | -              | **                  | M2       |
| Width of hypochile (HW)       |                   |     |     |     |                 | ***    | ***            | ***                 | M1       |
| Length of hypochile (HL)      | ***               | **  | **  |     | ***             | -      | -              | ***                 | M2       |
| Length of epichile (LE)       |                   |     | **  |     |                 | -      | -              | ***                 | M2       |
| Length of isthmus (LI)        |                   |     |     |     | *               | ***    | ***            | ***                 | M1       |
| Width of epichile (WE)        |                   |     |     |     | *               | **     | **             | *                   | M1       |
| Width of isthmus (WI)         | *                 |     |     | **  | **              | -      | -              | ***                 | M2       |
| Isthmus area (AI)             | *                 |     |     |     | ***             | -      | -              | ***                 | M1       |
| Shoot height                  |                   |     |     |     | ***             | ***    | ***            | ***                 | M1       |
| Inflorescence length          |                   |     |     |     | ***             | ***    | **             | ***                 | M1       |
| Flower number                 | **                |     | *** |     | **              | -      | -              | **                  | M2       |

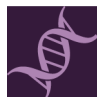

**Table S2.** Correlation matrices for floral display and flower structure acids dataset. The values show the Spearman's rank correlation coefficient  $r_s$ . Significant correlations ( $p < 0.05$ ) are in red. 'x' indicates that correlation analysis could not be performed.

| Floral display and<br>flower structure | ZAB population |       |      |       |       |      |      |      |      |       |       |      |       |       |      |      | Shoot<br>height | Inflorescence<br>length | Flower<br>number |
|----------------------------------------|----------------|-------|------|-------|-------|------|------|------|------|-------|-------|------|-------|-------|------|------|-----------------|-------------------------|------------------|
|                                        | LDS            | WDS   | LP   | WP    | LLS   | WLS  | FW   | FH   | LL   | HW    | HL    | LE   | LI    | WE    | WI   | AI   |                 |                         |                  |
| LDS                                    | 1.00           |       |      |       |       |      |      |      |      |       |       |      |       |       |      |      |                 |                         |                  |
| WDS                                    | 0.47           | 1.00  |      |       |       |      |      |      |      |       |       |      |       |       |      |      |                 |                         |                  |
| LP                                     | 0.78           | 0.28  | 1.00 |       |       |      |      |      |      |       |       |      |       |       |      |      |                 |                         |                  |
| WP                                     | 0.09           | 0.21  | 0.24 | 1.00  |       |      |      |      |      |       |       |      |       |       |      |      |                 |                         |                  |
| LLS                                    | 0.80           | 0.44  | 0.66 | 0.07  | 1.00  |      |      |      |      |       |       |      |       |       |      |      |                 |                         |                  |
| WLS                                    | 0.47           | 0.43  | 0.32 | 0.40  | 0.39  | 1.00 |      |      |      |       |       |      |       |       |      |      |                 |                         |                  |
| FW                                     | 0.70           | 0.46  | 0.52 | -0.04 | 0.67  | 0.27 | 1.00 |      |      |       |       |      |       |       |      |      |                 |                         |                  |
| FH                                     | 0.96           | 0.48  | 0.78 | 0.13  | 0.71  | 0.49 | 0.64 | 1.00 |      |       |       |      |       |       |      |      |                 |                         |                  |
| LL                                     | 0.66           | 0.43  | 0.53 | 0.38  | 0.58  | 0.56 | 0.52 | 0.58 | 1.00 |       |       |      |       |       |      |      |                 |                         |                  |
| HW                                     | 0.52           | 0.18  | 0.36 | 0.18  | 0.55  | 0.25 | 0.43 | 0.41 | 0.58 | 1.00  |       |      |       |       |      |      |                 |                         |                  |
| HL                                     | 0.20           | -0.13 | 0.13 | 0.26  | 0.07  | 0.20 | 0.12 | 0.20 | 0.38 | 0.27  | 1.00  |      |       |       |      |      |                 |                         |                  |
| LE                                     | 0.45           | 0.55  | 0.36 | 0.29  | 0.45  | 0.32 | 0.41 | 0.38 | 0.68 | 0.41  | 0.05  | 1.00 |       |       |      |      |                 |                         |                  |
| LI                                     | 0.45           | 0.05  | 0.46 | 0.26  | 0.22  | 0.42 | 0.24 | 0.51 | 0.40 | 0.16  | 0.44  | 0.02 | 1.00  |       |      |      |                 |                         |                  |
| WE                                     | 0.06           | 0.16  | 0.05 | 0.25  | -0.14 | 0.14 | 0.15 | 0.06 | 0.29 | 0.18  | -0.09 | 0.19 | -0.05 | 1.00  |      |      |                 |                         |                  |
| WI                                     | 0.12           | 0.25  | 0.10 | 0.13  | 0.07  | 0.25 | 0.02 | 0.10 | 0.14 | 0.23  | 0.05  | 0.19 | 0.30  | -0.04 | 1.00 |      |                 |                         |                  |
| AI                                     | 0.38           | 0.17  | 0.37 | 0.28  | 0.17  | 0.47 | 0.17 | 0.42 | 0.36 | 0.22  | 0.31  | 0.13 | 0.85  | -0.02 | 0.71 | 1.00 |                 |                         |                  |
| Shoot height                           | 0.12           | 0.52  | 0.00 | 0.15  | -0.02 | 0.33 | 0.12 | 0.14 | 0.41 | -0.05 | 0.14  | 0.34 | 0.16  | 0.18  | 0.03 | 0.15 | 1.00            |                         |                  |
| Inflorescence length                   | 0.18           | 0.40  | 0.05 | 0.24  | 0.02  | 0.30 | 0.18 | 0.17 | 0.46 | 0.07  | 0.21  | 0.45 | 0.30  | 0.36  | 0.18 | 0.28 | 0.74            | 1.00                    |                  |
| Flower number                          | -0.06          | 0.39  | 0.08 | 0.25  | -0.26 | 0.25 | 0.05 | 0.01 | 0.28 | -0.17 | -0.15 | 0.34 | 0.21  | 0.29  | 0.17 | 0.29 | 0.49            | 0.42                    | 1.00             |



| Floral display and<br>flower structure | ROS population |       |       |       |       |       |      |       |      |       |       |      |       |      |       |      | Shoot<br>height | Inflorescence<br>length | Flower<br>number |
|----------------------------------------|----------------|-------|-------|-------|-------|-------|------|-------|------|-------|-------|------|-------|------|-------|------|-----------------|-------------------------|------------------|
|                                        | LDS            | WDS   | LP    | WP    | LLS   | WLS   | FW   | FH    | LL   | HW    | HL    | LE   | LI    | WE   | WI    | AI   |                 |                         |                  |
| LDS                                    | 1.00           |       |       |       |       |       |      |       |      |       |       |      |       |      |       |      |                 |                         |                  |
| WDS                                    | 0.57           | 1.00  |       |       |       |       |      |       |      |       |       |      |       |      |       |      |                 |                         |                  |
| LP                                     | 0.70           | 0.60  | 1.00  |       |       |       |      |       |      |       |       |      |       |      |       |      |                 |                         |                  |
| WP                                     | 0.59           | 0.47  | 0.55  | 1.00  |       |       |      |       |      |       |       |      |       |      |       |      |                 |                         |                  |
| LLS                                    | 0.74           | 0.52  | 0.68  | 0.51  | 1.00  |       |      |       |      |       |       |      |       |      |       |      |                 |                         |                  |
| WLS                                    | 0.46           | 0.45  | 0.64  | 0.60  | 0.64  | 1.00  |      |       |      |       |       |      |       |      |       |      |                 |                         |                  |
| FW                                     | 0.70           | 0.44  | 0.64  | 0.41  | 0.67  | 0.45  | 1.00 |       |      |       |       |      |       |      |       |      |                 |                         |                  |
| FH                                     | 0.92           | 0.63  | 0.79  | 0.69  | 0.82  | 0.58  | 0.75 | 1.00  |      |       |       |      |       |      |       |      |                 |                         |                  |
| LL                                     | 0.52           | 0.64  | 0.48  | 0.36  | 0.50  | 0.23  | 0.38 | 0.54  | 1.00 |       |       |      |       |      |       |      |                 |                         |                  |
| HW                                     | -0.03          | 0.12  | 0.22  | 0.14  | 0.14  | 0.01  | 0.16 | 0.09  | 0.37 | 1.00  |       |      |       |      |       |      |                 |                         |                  |
| HL                                     | 0.12           | 0.51  | 0.32  | 0.18  | 0.25  | 0.24  | 0.09 | 0.21  | 0.69 | 0.35  | 1.00  |      |       |      |       |      |                 |                         |                  |
| LE                                     | 0.34           | 0.57  | 0.28  | 0.18  | 0.44  | 0.12  | 0.26 | 0.38  | 0.75 | 0.34  | 0.35  | 1.00 |       |      |       |      |                 |                         |                  |
| LI                                     | -0.22          | -0.06 | -0.07 | -0.16 | 0.02  | -0.08 | 0.07 | -0.20 | 0.30 | 0.58  | 0.38  | 0.13 | 1.00  |      |       |      |                 |                         |                  |
| WE                                     | 0.31           | 0.47  | 0.19  | 0.26  | 0.31  | 0.05  | 0.21 | 0.31  | 0.67 | 0.40  | 0.37  | 0.61 | 0.16  | 1.00 |       |      |                 |                         |                  |
| WI                                     | 0.03           | 0.24  | -0.12 | 0.14  | -0.07 | -0.07 | 0.08 | 0.03  | 0.32 | 0.21  | 0.21  | 0.39 | 0.15  | 0.54 | 1.00  |      |                 |                         |                  |
| AI                                     | -0.14          | 0.14  | -0.12 | 0.02  | 0.00  | -0.04 | 0.12 | -0.12 | 0.39 | 0.52  | 0.42  | 0.33 | 0.78  | 0.43 | 0.71  | 1.00 |                 |                         |                  |
| Shoot height                           | 0.30           | 0.04  | 0.03  | 0.07  | 0.30  | 0.15  | 0.15 | 0.23  | 0.28 | -0.08 | -0.05 | 0.26 | -0.15 | 0.28 | 0.20  | 0.01 | 1.00            |                         |                  |
| Inflorescence length                   | 0.35           | -0.02 | 0.39  | 0.18  | 0.47  | 0.35  | 0.33 | 0.44  | 0.18 | 0.12  | 0.11  | 0.18 | 0.14  | 0.00 | -0.04 | 0.05 | 0.29            | 1.00                    |                  |
| Flower number                          | 0.31           | 0.15  | 0.31  | 0.11  | 0.32  | 0.23  | 0.24 | 0.39  | 0.25 | -0.09 | 0.22  | 0.19 | -0.04 | 0.16 | 0.37  | 0.13 | 0.17            | 0.53                    | 1.00             |



| Floral display and<br>flower structure | SIL population |       |      |       |       |       |       |       |       |       |       |      |       |      |       |       | Shoot<br>height | Inflorescence<br>length | Flower<br>number |
|----------------------------------------|----------------|-------|------|-------|-------|-------|-------|-------|-------|-------|-------|------|-------|------|-------|-------|-----------------|-------------------------|------------------|
|                                        | LDS            | WDS   | LP   | WP    | LLS   | WLS   | FW    | FH    | LL    | HW    | HL    | LE   | LI    | WE   | WI    | AI    |                 |                         |                  |
| LDS                                    | 1.00           |       |      |       |       |       |       |       |       |       |       |      |       |      |       |       |                 |                         |                  |
| WDS                                    | 0.52           | 1.00  |      |       |       |       |       |       |       |       |       |      |       |      |       |       |                 |                         |                  |
| LP                                     | 0.69           | 0.47  | 1.00 |       |       |       |       |       |       |       |       |      |       |      |       |       |                 |                         |                  |
| WP                                     | 0.66           | 0.52  | 0.65 | 1.00  |       |       |       |       |       |       |       |      |       |      |       |       |                 |                         |                  |
| LLS                                    | 0.33           | 0.52  | 0.20 | 0.16  | 1.00  |       |       |       |       |       |       |      |       |      |       |       |                 |                         |                  |
| WLS                                    | 0.24           | 0.76  | 0.29 | 0.36  | 0.45  | 1.00  |       |       |       |       |       |      |       |      |       |       |                 |                         |                  |
| FW                                     | 0.56           | 0.41  | 0.59 | 0.49  | 0.49  | 0.37  | 1.00  |       |       |       |       |      |       |      |       |       |                 |                         |                  |
| FH                                     | 0.95           | 0.51  | 0.72 | 0.63  | 0.38  | 0.23  | 0.55  | 1.00  |       |       |       |      |       |      |       |       |                 |                         |                  |
| LL                                     | 0.53           | 0.65  | 0.55 | 0.54  | 0.34  | 0.44  | 0.53  | 0.52  | 1.00  |       |       |      |       |      |       |       |                 |                         |                  |
| HW                                     | -0.35          | -0.05 | 0.01 | -0.30 | -0.05 | 0.02  | 0.02  | -0.29 | -0.01 | 1.00  |       |      |       |      |       |       |                 |                         |                  |
| HL                                     | 0.14           | 0.43  | 0.33 | 0.43  | 0.18  | 0.53  | 0.43  | 0.19  | 0.59  | 0.25  | 1.00  |      |       |      |       |       |                 |                         |                  |
| LE                                     | 0.70           | 0.38  | 0.51 | 0.57  | 0.43  | 0.21  | 0.48  | 0.67  | 0.58  | -0.47 | 0.09  | 1.00 |       |      |       |       |                 |                         |                  |
| LI                                     | 0.11           | 0.22  | 0.23 | 0.24  | 0.19  | 0.35  | 0.35  | 0.11  | 0.21  | 0.31  | 0.33  | 0.03 | 1.00  |      |       |       |                 |                         |                  |
| WE                                     | 0.66           | 0.35  | 0.47 | 0.45  | 0.10  | 0.21  | 0.37  | 0.58  | 0.55  | -0.16 | 0.12  | 0.62 | 0.25  | 1.00 |       |       |                 |                         |                  |
| WI                                     | 0.16           | 0.39  | 0.13 | 0.12  | 0.46  | 0.38  | 0.21  | 0.13  | 0.06  | 0.16  | 0.03  | 0.22 | 0.41  | 0.22 | 1.00  |       |                 |                         |                  |
| AI                                     | 0.12           | 0.32  | 0.18 | 0.16  | 0.35  | 0.40  | 0.29  | 0.08  | 0.14  | 0.27  | 0.22  | 0.11 | 0.84  | 0.22 | 0.80  | 1.00  |                 |                         |                  |
| Shoot height                           | 0.37           | 0.07  | 0.46 | 0.32  | 0.12  | -0.03 | 0.31  | 0.35  | 0.26  | 0.02  | 0.04  | 0.37 | 0.16  | 0.40 | -0.07 | 0.00  | 1.00            |                         |                  |
| Inflorescence length                   | 0.28           | -0.02 | 0.13 | 0.20  | 0.25  | -0.19 | 0.14  | 0.34  | 0.14  | -0.04 | 0.16  | 0.32 | -0.02 | 0.13 | -0.06 | -0.06 | 0.58            | 1.00                    |                  |
| Flower number                          | 0.15           | -0.13 | 0.23 | -0.01 | -0.04 | -0.14 | -0.02 | 0.23  | -0.11 | -0.14 | -0.10 | 0.11 | -0.24 | 0.09 | -0.36 | -0.38 | 0.48            | 0.38                    | 1.00             |



| Floral display and<br>flower structure | SOP population |       |       |      |      |       |       |       |       |       |       |       |       |       |       |       | Shoot<br>height | Inflorescence<br>length | Flower<br>number |
|----------------------------------------|----------------|-------|-------|------|------|-------|-------|-------|-------|-------|-------|-------|-------|-------|-------|-------|-----------------|-------------------------|------------------|
|                                        | LDS            | WDS   | LP    | WP   | LLS  | WLS   | FW    | FH    | LL    | HW    | HL    | LE    | LI    | WE    | WI    | AI    |                 |                         |                  |
| LDS                                    | 1.00           |       |       |      |      |       |       |       |       |       |       |       |       |       |       |       |                 |                         |                  |
| WDS                                    | 0.86           | 1.00  |       |      |      |       |       |       |       |       |       |       |       |       |       |       |                 |                         |                  |
| LP                                     | 0.74           | 0.85  | 1.00  |      |      |       |       |       |       |       |       |       |       |       |       |       |                 |                         |                  |
| WP                                     | 0.69           | 0.83  | 0.83  | 1.00 |      |       |       |       |       |       |       |       |       |       |       |       |                 |                         |                  |
| LLS                                    | 0.72           | 0.82  | 0.82  | 0.75 | 1.00 |       |       |       |       |       |       |       |       |       |       |       |                 |                         |                  |
| WLS                                    | 0.77           | 0.83  | 0.61  | 0.68 | 0.65 | 1.00  |       |       |       |       |       |       |       |       |       |       |                 |                         |                  |
| FW                                     | 0.89           | 0.90  | 0.89  | 0.76 | 0.89 | 0.74  | 1.00  |       |       |       |       |       |       |       |       |       |                 |                         |                  |
| FH                                     | 0.90           | 0.82  | 0.75  | 0.70 | 0.76 | 0.74  | 0.89  | 1.00  |       |       |       |       |       |       |       |       |                 |                         |                  |
| LL                                     | 0.70           | 0.69  | 0.72  | 0.57 | 0.53 | 0.61  | 0.69  | 0.66  | 1.00  |       |       |       |       |       |       |       |                 |                         |                  |
| HW                                     | 0.29           | 0.25  | 0.54  | 0.30 | 0.32 | 0.11  | 0.41  | 0.31  | 0.57  | 1.00  |       |       |       |       |       |       |                 |                         |                  |
| HL                                     | 0.67           | 0.70  | 0.76  | 0.68 | 0.61 | 0.57  | 0.71  | 0.63  | 0.80  | 0.55  | 1.00  |       |       |       |       |       |                 |                         |                  |
| LE                                     | 0.78           | 0.69  | 0.60  | 0.59 | 0.67 | 0.56  | 0.73  | 0.72  | 0.67  | 0.32  | 0.57  | 1.00  |       |       |       |       |                 |                         |                  |
| LI                                     | 0.36           | 0.32  | 0.53  | 0.45 | 0.26 | 0.34  | 0.36  | 0.29  | 0.60  | 0.67  | 0.76  | 0.41  | 1.00  |       |       |       |                 |                         |                  |
| WE                                     | 0.65           | 0.56  | 0.42  | 0.48 | 0.48 | 0.44  | 0.59  | 0.52  | 0.46  | 0.27  | 0.56  | 0.69  | 0.49  | 1.00  |       |       |                 |                         |                  |
| WI                                     | 0.59           | 0.62  | 0.78  | 0.61 | 0.57 | 0.49  | 0.63  | 0.62  | 0.76  | 0.56  | 0.69  | 0.49  | 0.61  | 0.30  | 1.00  |       |                 |                         |                  |
| AI                                     | 0.55           | 0.54  | 0.74  | 0.61 | 0.48 | 0.49  | 0.59  | 0.54  | 0.76  | 0.70  | 0.81  | 0.51  | 0.89  | 0.50  | 0.88  | 1.00  |                 |                         |                  |
| Shoot height                           | 0.48           | 0.45  | 0.48  | 0.53 | 0.61 | 0.44  | 0.56  | 0.46  | 0.27  | 0.27  | 0.43  | 0.20  | 0.19  | 0.17  | 0.19  | 0.23  | 1.00            |                         |                  |
| Inflorescence length                   | 0.42           | 0.47  | 0.47  | 0.55 | 0.61 | 0.43  | 0.58  | 0.41  | 0.23  | 0.16  | 0.36  | 0.41  | 0.12  | 0.19  | 0.24  | 0.19  | 0.65            | 1.00                    |                  |
| Flower number                          | -0.01          | -0.05 | -0.13 | 0.03 | 0.00 | -0.08 | -0.06 | -0.04 | -0.28 | -0.18 | -0.11 | -0.17 | -0.23 | -0.03 | -0.17 | -0.22 | 0.40            | 0.30                    | 1.00             |

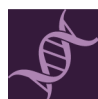

**Table S3.** Kaiser-Meyer-Olkin test results for flower structure dataset used for principal components analysis sorted in descending order by the measure of sampling adequacy (MSA) (overall MSA = 0.84).

| Parameter                     | MSA  |
|-------------------------------|------|
| Width of flowers (FW)         | 0.96 |
| Width of dorsal sepal (WDS)   | 0.93 |
| Length of flowers (FH)        | 0.90 |
| Width of hypochile (HW)       | 0.90 |
| Length of dorsal sepal (LDS)  | 0.89 |
| Length of petal (LP)          | 0.89 |
| Width of lateral sepal (WLS)  | 0.89 |
| Length of labellum (LL)       | 0.89 |
| Length of hypochile (HL)      | 0.88 |
| Width of epichile (WE)        | 0.86 |
| Length of lateral sepal (LLS) | 0.85 |
| Length of epichile (LE)       | 0.85 |
| Width of petal (WP)           | 0.82 |
| Length of isthmus (LI)        | 0.68 |
| Width of isthmus (WI)         | 0.48 |

**Table S4.** The sugar ratios in *Epipactis palustris* nectar. Data (n = 30) represent the mean ( $\bar{x}$ )  $\pm$  standard error (SE). Different lowercase letters indicate statistically significant differences according to Tukey's post-hoc test ( $p < 0.05$ ). Different uppercase letters indicate statistically significant differences according to the pairwise Wilcoxon Rank Sum test with Benjamini-Hochberg adjustment ( $p < 0.05$ ).

| Parameter                                      | Natural populations           |                               | Anthropogenic populations     |                               |
|------------------------------------------------|-------------------------------|-------------------------------|-------------------------------|-------------------------------|
|                                                | ZAB                           | ROS                           | SIL                           | SOP                           |
| Fructose / glucose                             | 1.12 $\pm$ 0.024 <sup>A</sup> | 1.07 $\pm$ 0.026 <sup>A</sup> | 1.14 $\pm$ 0.040 <sup>A</sup> | 1.03 $\pm$ 0.029 <sup>A</sup> |
| Sucrose / (fructose + glucose)                 | 0.93 $\pm$ 0.033 <sup>C</sup> | 0.86 $\pm$ 0.023 <sup>A</sup> | 0.57 $\pm$ 0.017 <sup>B</sup> | 0.58 $\pm$ 0.011 <sup>B</sup> |
| Sugar content in nectar (sum of sugars, mg/mL) | 48.09 $\pm$ 7.49 <sup>A</sup> | 40.68 $\pm$ 1.47 <sup>B</sup> | 34.05 $\pm$ 1.36 <sup>C</sup> | 35.00 $\pm$ 1.36 <sup>C</sup> |

**Table S5.** *P*-values for different tests on sugars' datasets (n = 30). M1 – Two-way ANOVA with Tukey's post-hoc test. Blank cell for *p*-value  $> 0.05$ ; \* for *p*-value  $\leq 0.05$ ; \*\* for *p*-value  $\leq 0.01$ ; \*\*\* for *p*-value  $\leq 0.001$ .

| Parameter | Shapiro-Wilk test |     |     |     | Bartlett's test | F test | Welch's F test | Analysis |
|-----------|-------------------|-----|-----|-----|-----------------|--------|----------------|----------|
|           | ZAB               | ROS | SIL | SOP |                 |        |                |          |
| Glucose   |                   |     |     |     | *               | *      | *              | M1       |
| Fructose  |                   |     |     |     |                 | **     | **             | M1       |
| Sucrose   |                   |     |     |     | ***             | ***    | ***            | M1       |



**Table S6.** *P*-values for different tests on amino acid' datasets (n = 30). M1 – Two-way ANOVA with Tukey's post-hoc test. M2 – Kruskal-Wallis rank sum test with Wilcoxon rank sum test with Benjamini-Hochberg *p*-value correction. Blank cell for *p*-value > 0.05; \* for *p*-value ≤ 0.05; \*\* for *p*-value ≤ 0.01; \*\*\* for *p*-value ≤ 0.001. The symbol (-) indicates that the statistical test or M1/M2 analysis could not be performed (AA not detected for required number of populations).

| Parameter                  | Shapiro-Wilk test |     |     |     | Bartlett's test | F test | Welch's F test | Kruskal-Wallis test | Analysis |
|----------------------------|-------------------|-----|-----|-----|-----------------|--------|----------------|---------------------|----------|
|                            | ZAB               | ROS | SIL | SOP |                 |        |                |                     |          |
| Aspartic acid (Asp)        |                   |     |     | **  |                 | -      | -              | ***                 | M2       |
| Glutamic acid (Glu)        |                   |     |     |     | *               | ***    | ***            | ***                 | M1       |
| Alanine (Ala)              |                   |     |     | **  | **              | -      | -              | ***                 | M2       |
| Cysteine (Cys)             |                   | **  |     |     | ***             | -      | -              | ***                 | M2       |
| Glycine (Gly)              |                   |     | *** |     | ***             | -      | -              | ***                 | M2       |
| Serine (Ser)               |                   |     | *** |     | ***             | -      | -              | ***                 | M2       |
| Threonine (Thr)            |                   |     |     |     | ***             | ***    | ***            | ***                 | M1       |
| Tyrosine (Tyr)             |                   |     | *** | *** |                 | -      | -              | ***                 | M2       |
| Arginine (Arg)             |                   |     |     |     | ***             | ***    | ***            | ***                 | M1       |
| Asparagine (Asn)           | **                |     |     |     | ***             | -      | -              | ***                 | M2       |
| Glutamine (Gln)            |                   |     |     |     | ***             | ***    | ***            | ***                 | M1       |
| Histidine (His)            |                   |     |     |     | ***             | ***    | ***            | ***                 | M1       |
| Lysine (Lys)               |                   | **  |     | **  | ***             | -      | -              | ***                 | M2       |
| Proline (Pro)              |                   |     |     |     | ***             | ***    | ***            | ***                 | M1       |
| Isoleucine (Ile)           |                   |     |     |     | ***             | ***    | ***            | ***                 | M1       |
| Leucine (Leu)              |                   |     |     |     | ***             | ***    | ***            | ***                 | M1       |
| Methionine (Met)           |                   |     |     |     | ***             | ***    | ***            | ***                 | M1       |
| Phenylalanine (Phe)        |                   |     |     |     | ***             | **     | ***            | ***                 | M1       |
| Tryptophan (Trp)           |                   |     |     | **  | ***             | -      | -              | ***                 | M2       |
| Valine (Val)               |                   |     |     |     | **              | ***    | ***            | ***                 | M1       |
| Ornithine (Orn)            | **                | *** |     |     | ***             | -      | -              | ***                 | M2       |
| Citrulline (Cit)           | ***               | -   | -   | -   | -               | -      | -              | -                   | -        |
| Taurine (Tau)              | **                | *   |     | -   | ***             | -      | -              | ***                 | M2       |
| α-aminobutyric acid (AABA) |                   |     |     |     | **              | ***    | ***            | ***                 | M1       |
| β-aminobutyric acid (BABA) |                   | *   | *   |     | ***             | -      | -              | ***                 | M2       |
| γ-aminobutyric acid (GABA) | ***               |     |     |     | ***             | -      | -              | ***                 | M2       |
| β-alanine (β-Ala)          | *                 | *   | -   | -   | ***             | -      | -              | -                   | M2       |
| Sum of amino acids         |                   |     |     |     | ***             | ***    | ***            | ***                 | M1       |





**Table S7.** Correlation matrices for amino acids dataset. The values show the Spearman's rank correlation coefficient  $r_s$ . Significant correlations ( $p < 0.05$ ) are in red. 'x' indicates that correlation analysis could not be performed.

| Amino acid | ZAB population |       |       |       |       |       |       |       |       |       |       |       |       |       |       |       |       |       |       |       |       |       |       |       |      |      |       |
|------------|----------------|-------|-------|-------|-------|-------|-------|-------|-------|-------|-------|-------|-------|-------|-------|-------|-------|-------|-------|-------|-------|-------|-------|-------|------|------|-------|
|            | Asp            | Glu   | Ala   | Cys   | Gly   | Ser   | Thr   | Tyr   | Arg   | Asn   | Gln   | His   | Lys   | Pro   | Ile   | Leu   | Met   | Phe   | Trp   | Val   | Orn   | Cit   | Tau   | AABA  | BABA | GABA | β-Ala |
| Asp        | 1.00           |       |       |       |       |       |       |       |       |       |       |       |       |       |       |       |       |       |       |       |       |       |       |       |      |      |       |
| Glu        | 0.38           | 1.00  |       |       |       |       |       |       |       |       |       |       |       |       |       |       |       |       |       |       |       |       |       |       |      |      |       |
| Ala        | 0.09           | -0.09 | 1.00  |       |       |       |       |       |       |       |       |       |       |       |       |       |       |       |       |       |       |       |       |       |      |      |       |
| Cys        | 0.38           | 0.20  | -0.11 | 1.00  |       |       |       |       |       |       |       |       |       |       |       |       |       |       |       |       |       |       |       |       |      |      |       |
| Gly        | -0.11          | -0.35 | -0.29 | -0.15 | 1.00  |       |       |       |       |       |       |       |       |       |       |       |       |       |       |       |       |       |       |       |      |      |       |
| Ser        | -0.03          | -0.26 | 0.11  | -0.02 | 0.15  | 1.00  |       |       |       |       |       |       |       |       |       |       |       |       |       |       |       |       |       |       |      |      |       |
| Thr        | 0.39           | 0.42  | 0.08  | 0.10  | 0.14  | 0.22  | 1.00  |       |       |       |       |       |       |       |       |       |       |       |       |       |       |       |       |       |      |      |       |
| Tyr        | 0.38           | 0.20  | 0.39  | 0.13  | -0.20 | 0.09  | 0.09  | 1.00  |       |       |       |       |       |       |       |       |       |       |       |       |       |       |       |       |      |      |       |
| Arg        | 0.41           | 0.29  | 0.34  | 0.00  | -0.17 | 0.11  | 0.59  | 0.47  | 1.00  |       |       |       |       |       |       |       |       |       |       |       |       |       |       |       |      |      |       |
| Asn        | 0.18           | 0.10  | 0.42  | 0.11  | -0.17 | -0.32 | -0.09 | 0.06  | 0.04  | 1.00  |       |       |       |       |       |       |       |       |       |       |       |       |       |       |      |      |       |
| Gln        | 0.06           | -0.18 | 0.57  | 0.05  | -0.40 | -0.11 | -0.32 | 0.19  | -0.01 | 0.43  | 1.00  |       |       |       |       |       |       |       |       |       |       |       |       |       |      |      |       |
| His        | 0.23           | 0.03  | 0.28  | 0.19  | -0.36 | 0.04  | -0.04 | 0.11  | -0.06 | 0.43  | 0.44  | 1.00  |       |       |       |       |       |       |       |       |       |       |       |       |      |      |       |
| Lys        | -0.24          | -0.16 | 0.06  | -0.27 | -0.15 | 0.15  | -0.34 | -0.04 | -0.06 | 0.19  | 0.08  | 0.12  | 1.00  |       |       |       |       |       |       |       |       |       |       |       |      |      |       |
| Pro        | -0.27          | -0.26 | -0.29 | 0.17  | -0.15 | -0.23 | -0.61 | -0.10 | -0.33 | 0.06  | -0.01 | 0.04  | 0.30  | 1.00  |       |       |       |       |       |       |       |       |       |       |      |      |       |
| Ile        | 0.22           | 0.11  | 0.21  | 0.35  | -0.13 | 0.03  | -0.22 | 0.60  | 0.09  | 0.23  | 0.31  | 0.09  | -0.01 | 0.05  | 1.00  |       |       |       |       |       |       |       |       |       |      |      |       |
| Leu        | 0.27           | 0.04  | 0.27  | 0.28  | 0.03  | 0.12  | -0.08 | 0.34  | 0.00  | 0.26  | 0.24  | 0.20  | -0.04 | -0.04 | 0.75  | 1.00  |       |       |       |       |       |       |       |       |      |      |       |
| Met        | 0.38           | 0.42  | -0.11 | 0.56  | 0.06  | -0.28 | 0.27  | 0.05  | 0.10  | -0.06 | -0.03 | -0.14 | -0.64 | -0.25 | 0.33  | 0.28  | 1.00  |       |       |       |       |       |       |       |      |      |       |
| Phe        | 0.28           | 0.21  | 0.12  | 0.19  | 0.10  | 0.16  | 0.20  | 0.02  | -0.12 | -0.03 | 0.07  | 0.12  | -0.37 | -0.45 | 0.11  | 0.18  | 0.47  | 1.00  |       |       |       |       |       |       |      |      |       |
| Trp        | 0.33           | 0.28  | 0.09  | 0.36  | -0.33 | -0.25 | 0.02  | 0.12  | -0.06 | 0.29  | 0.35  | 0.38  | -0.22 | 0.16  | 0.14  | 0.11  | 0.32  | 0.28  | 1.00  |       |       |       |       |       |      |      |       |
| Val        | 0.25           | 0.32  | 0.34  | 0.34  | -0.22 | -0.26 | 0.27  | 0.16  | 0.26  | 0.20  | 0.36  | 0.05  | -0.10 | -0.18 | 0.27  | 0.27  | 0.42  | -0.08 | 0.35  | 1.00  |       |       |       |       |      |      |       |
| Orn        | 0.04           | 0.29  | -0.39 | -0.12 | 0.29  | 0.03  | 0.25  | 0.11  | 0.07  | -0.37 | -0.78 | -0.35 | -0.02 | 0.10  | -0.20 | -0.24 | 0.04  | -0.06 | -0.17 | -0.35 | 1.00  |       |       |       |      |      |       |
| Cit        | 0.01           | 0.06  | -0.02 | 0.15  | 0.17  | 0.16  | 0.12  | -0.23 | -0.22 | 0.28  | -0.22 | 0.24  | 0.05  | 0.22  | -0.28 | -0.19 | -0.10 | 0.15  | 0.33  | -0.08 | 0.15  | 1.00  |       |       |      |      |       |
| Tau        | 0.08           | 0.31  | -0.06 | 0.02  | 0.23  | 0.28  | 0.31  | 0.33  | 0.17  | -0.20 | -0.60 | -0.28 | -0.17 | -0.18 | 0.13  | 0.23  | 0.14  | 0.25  | -0.21 | -0.32 | 0.55  | 0.17  | 1.00  |       |      |      |       |
| AABA       | -0.19          | 0.23  | 0.16  | -0.17 | 0.03  | -0.10 | 0.10  | 0.08  | 0.24  | 0.23  | -0.26 | -0.32 | -0.17 | -0.03 | 0.26  | 0.22  | 0.14  | -0.06 | -0.19 | -0.04 | 0.14  | -0.01 | 0.47  | 1.00  |      |      |       |
| BABA       | 0.03           | 0.15  | 0.43  | 0.17  | -0.20 | -0.16 | 0.04  | 0.06  | 0.02  | 0.49  | 0.51  | 0.43  | 0.14  | -0.04 | 0.18  | 0.29  | 0.02  | 0.21  | 0.45  | 0.54  | -0.55 | 0.28  | -0.25 | -0.02 | 1.00 |      |       |
| GABA       | 0.29           | 0.50  | 0.22  | 0.21  | -0.25 | -0.07 | 0.35  | 0.33  | 0.39  | 0.20  | 0.09  | 0.07  | -0.21 | -0.13 | 0.42  | 0.40  | 0.35  | -0.04 | 0.35  | 0.47  | 0.09  | -0.21 | 0.08  | 0.42  | 0.17 | 1.00 |       |
| β-Ala      | 0.42           | 0.16  | 0.25  | 0.30  | -0.04 | 0.20  | 0.21  | 0.35  | 0.15  | 0.04  | 0.22  | 0.33  | -0.10 | -0.30 | 0.20  | 0.34  | 0.24  | 0.39  | 0.40  | 0.31  | -0.18 | 0.24  | 0.22  | -0.31 | 0.49 | 0.03 | 1.00  |



| Amino acid | ROS population |       |       |       |       |       |       |       |       |       |       |       |       |       |       |       |       |       |       |       |       |      |       |       |       |      |       |
|------------|----------------|-------|-------|-------|-------|-------|-------|-------|-------|-------|-------|-------|-------|-------|-------|-------|-------|-------|-------|-------|-------|------|-------|-------|-------|------|-------|
|            | Asp            | Glu   | Ala   | Cys   | Gly   | Ser   | Thr   | Tyr   | Arg   | Asn   | Gln   | His   | Lys   | Pro   | Ile   | Leu   | Met   | Phe   | Trp   | Val   | Orn   | Cit  | Tau   | AABA  | BABA  | GABA | β-Ala |
| Asp        | 1.00           |       |       |       |       |       |       |       |       |       |       |       |       |       |       |       |       |       |       |       |       |      |       |       |       |      |       |
| Glu        | 0.55           | 1.00  |       |       |       |       |       |       |       |       |       |       |       |       |       |       |       |       |       |       |       |      |       |       |       |      |       |
| Ala        | 0.24           | 0.28  | 1.00  |       |       |       |       |       |       |       |       |       |       |       |       |       |       |       |       |       |       |      |       |       |       |      |       |
| Cys        | -0.15          | 0.06  | 0.07  | 1.00  |       |       |       |       |       |       |       |       |       |       |       |       |       |       |       |       |       |      |       |       |       |      |       |
| Gly        | -0.22          | -0.04 | -0.17 | 0.06  | 1.00  |       |       |       |       |       |       |       |       |       |       |       |       |       |       |       |       |      |       |       |       |      |       |
| Ser        | 0.18           | 0.18  | 0.03  | -0.29 | -0.32 | 1.00  |       |       |       |       |       |       |       |       |       |       |       |       |       |       |       |      |       |       |       |      |       |
| Thr        | 0.17           | -0.19 | -0.30 | -0.16 | 0.18  | -0.02 | 1.00  |       |       |       |       |       |       |       |       |       |       |       |       |       |       |      |       |       |       |      |       |
| Tyr        | 0.09           | -0.11 | 0.15  | 0.00  | 0.01  | 0.19  | -0.18 | 1.00  |       |       |       |       |       |       |       |       |       |       |       |       |       |      |       |       |       |      |       |
| Arg        | 0.07           | -0.15 | -0.17 | 0.16  | -0.11 | 0.19  | 0.33  | -0.21 | 1.00  |       |       |       |       |       |       |       |       |       |       |       |       |      |       |       |       |      |       |
| Asn        | -0.32          | 0.00  | -0.07 | 0.07  | -0.30 | 0.29  | -0.36 | 0.22  | -0.05 | 1.00  |       |       |       |       |       |       |       |       |       |       |       |      |       |       |       |      |       |
| Gln        | -0.09          | 0.09  | -0.24 | 0.05  | 0.47  | -0.20 | -0.06 | -0.31 | -0.14 | -0.13 | 1.00  |       |       |       |       |       |       |       |       |       |       |      |       |       |       |      |       |
| His        | 0.06           | 0.32  | -0.06 | -0.28 | 0.16  | 0.10  | 0.09  | -0.31 | -0.03 | -0.11 | 0.01  | 1.00  |       |       |       |       |       |       |       |       |       |      |       |       |       |      |       |
| Lys        | -0.23          | -0.06 | -0.07 | -0.07 | -0.16 | 0.25  | -0.38 | 0.16  | -0.24 | 0.48  | 0.15  | -0.21 | 1.00  |       |       |       |       |       |       |       |       |      |       |       |       |      |       |
| Pro        | 0.14           | 0.19  | -0.01 | 0.49  | 0.07  | -0.08 | 0.14  | -0.17 | 0.34  | 0.00  | -0.02 | -0.03 | -0.29 | 1.00  |       |       |       |       |       |       |       |      |       |       |       |      |       |
| Ile        | -0.12          | -0.03 | -0.56 | 0.15  | 0.19  | 0.07  | 0.20  | -0.34 | 0.11  | -0.07 | 0.40  | 0.15  | -0.29 | 0.30  | 1.00  |       |       |       |       |       |       |      |       |       |       |      |       |
| Leu        | 0.05           | 0.15  | -0.36 | 0.20  | 0.41  | -0.19 | 0.01  | -0.21 | -0.06 | -0.22 | 0.64  | 0.06  | -0.19 | 0.16  | 0.74  | 1.00  |       |       |       |       |       |      |       |       |       |      |       |
| Met        | 0.15           | 0.40  | -0.06 | -0.03 | 0.26  | -0.11 | -0.11 | 0.36  | -0.37 | 0.02  | 0.16  | -0.03 | 0.11  | -0.21 | -0.10 | 0.32  | 1.00  |       |       |       |       |      |       |       |       |      |       |
| Phe        | -0.20          | -0.23 | 0.10  | 0.10  | 0.01  | -0.01 | 0.26  | -0.14 | 0.38  | 0.00  | -0.01 | 0.22  | -0.25 | 0.34  | 0.09  | -0.03 | -0.36 | 1.00  |       |       |       |      |       |       |       |      |       |
| Trp        | 0.19           | 0.00  | -0.16 | -0.03 | 0.04  | -0.01 | 0.67  | -0.32 | 0.11  | -0.24 | 0.07  | 0.16  | -0.23 | 0.02  | 0.24  | -0.05 | -0.15 | 0.01  | 1.00  |       |       |      |       |       |       |      |       |
| Val        | -0.01          | 0.36  | 0.16  | -0.01 | 0.36  | -0.01 | -0.03 | -0.04 | -0.18 | -0.19 | 0.51  | 0.24  | 0.02  | -0.05 | 0.06  | 0.19  | 0.28  | 0.23  | 0.01  | 1.00  |       |      |       |       |       |      |       |
| Orn        | -0.21          | 0.17  | -0.29 | 0.06  | 0.67  | 0.08  | 0.10  | -0.20 | 0.07  | -0.17 | 0.60  | 0.34  | -0.02 | 0.11  | 0.40  | 0.54  | 0.23  | 0.05  | -0.01 | 0.42  | 1.00  |      |       |       |       |      |       |
| Cit        | x              | x     | x     | x     | x     | x     | x     | x     | x     | x     | x     | x     | x     | x     | x     | x     | x     | x     | x     | x     | x     | 1.00 |       |       |       |      |       |
| Tau        | -0.37          | 0.06  | -0.35 | 0.16  | 0.48  | -0.13 | -0.09 | -0.41 | 0.07  | -0.14 | 0.69  | 0.02  | 0.09  | 0.03  | 0.33  | 0.40  | 0.14  | -0.02 | 0.02  | 0.41  | 0.63  | x    | 1.00  |       |       |      |       |
| AABA       | 0.60           | 0.29  | 0.20  | -0.14 | 0.04  | -0.15 | 0.21  | 0.04  | -0.09 | -0.23 | 0.15  | 0.28  | -0.24 | -0.16 | -0.06 | 0.13  | 0.11  | 0.00  | 0.36  | 0.15  | -0.05 | x    | -0.21 | 1.00  |       |      |       |
| BABA       | -0.26          | -0.25 | -0.46 | -0.18 | 0.18  | 0.34  | 0.22  | -0.28 | 0.32  | -0.01 | 0.32  | 0.15  | 0.13  | 0.19  | 0.49  | 0.30  | -0.36 | 0.34  | -0.03 | -0.02 | 0.48  | x    | 0.36  | -0.32 | 1.00  |      |       |
| GABA       | 0.05           | -0.01 | -0.04 | -0.02 | 0.20  | -0.17 | -0.05 | -0.35 | 0.03  | -0.53 | 0.49  | 0.03  | -0.03 | 0.03  | 0.17  | 0.38  | -0.08 | 0.10  | -0.10 | 0.23  | 0.30  | x    | 0.47  | -0.19 | 0.41  | 1.00 |       |
| β-Ala      | 0.03           | -0.14 | 0.26  | -0.10 | 0.09  | -0.10 | 0.14  | -0.10 | -0.25 | -0.38 | 0.00  | -0.11 | -0.06 | -0.12 | -0.10 | -0.24 | -0.16 | -0.06 | 0.29  | 0.17  | -0.17 | x    | 0.07  | 0.01  | -0.15 | 0.12 | 1.00  |



| Amino acid | SIL population |       |       |       |       |       |       |       |       |       |       |       |       |       |       |       |       |       |       |       |       |      |       |       |      |      |       |
|------------|----------------|-------|-------|-------|-------|-------|-------|-------|-------|-------|-------|-------|-------|-------|-------|-------|-------|-------|-------|-------|-------|------|-------|-------|------|------|-------|
|            | Asp            | Glu   | Ala   | Cys   | Gly   | Ser   | Thr   | Tyr   | Arg   | Asn   | Gln   | His   | Lys   | Pro   | Ile   | Leu   | Met   | Phe   | Trp   | Val   | Orn   | Cit  | Tau   | AABA  | BABA | GABA | β-Ala |
| Asp        | 1.00           |       |       |       |       |       |       |       |       |       |       |       |       |       |       |       |       |       |       |       |       |      |       |       |      |      |       |
| Glu        | 0.45           | 1.00  |       |       |       |       |       |       |       |       |       |       |       |       |       |       |       |       |       |       |       |      |       |       |      |      |       |
| Ala        | 0.10           | -0.15 | 1.00  |       |       |       |       |       |       |       |       |       |       |       |       |       |       |       |       |       |       |      |       |       |      |      |       |
| Cys        | -0.07          | -0.08 | 0.22  | 1.00  |       |       |       |       |       |       |       |       |       |       |       |       |       |       |       |       |       |      |       |       |      |      |       |
| Gly        | -0.06          | 0.20  | 0.21  | -0.43 | 1.00  |       |       |       |       |       |       |       |       |       |       |       |       |       |       |       |       |      |       |       |      |      |       |
| Ser        | 0.04           | 0.46  | 0.07  | -0.29 | 0.33  | 1.00  |       |       |       |       |       |       |       |       |       |       |       |       |       |       |       |      |       |       |      |      |       |
| Thr        | -0.01          | 0.20  | 0.59  | 0.13  | 0.36  | 0.47  | 1.00  |       |       |       |       |       |       |       |       |       |       |       |       |       |       |      |       |       |      |      |       |
| Tyr        | 0.18           | 0.31  | 0.17  | 0.21  | 0.24  | 0.17  | 0.58  | 1.00  |       |       |       |       |       |       |       |       |       |       |       |       |       |      |       |       |      |      |       |
| Arg        | 0.10           | 0.12  | -0.33 | 0.04  | -0.12 | -0.29 | -0.13 | 0.33  | 1.00  |       |       |       |       |       |       |       |       |       |       |       |       |      |       |       |      |      |       |
| Asn        | 0.20           | 0.30  | 0.45  | -0.23 | 0.33  | 0.70  | 0.46  | 0.27  | -0.26 | 1.00  |       |       |       |       |       |       |       |       |       |       |       |      |       |       |      |      |       |
| Gln        | 0.08           | 0.53  | -0.19 | 0.33  | -0.08 | 0.04  | -0.06 | 0.30  | 0.30  | 0.00  | 1.00  |       |       |       |       |       |       |       |       |       |       |      |       |       |      |      |       |
| His        | 0.03           | 0.33  | 0.50  | 0.22  | 0.24  | 0.59  | 0.46  | 0.20  | -0.18 | 0.66  | 0.05  | 1.00  |       |       |       |       |       |       |       |       |       |      |       |       |      |      |       |
| Lys        | -0.22          | 0.00  | -0.23 | 0.16  | -0.12 | -0.24 | -0.20 | 0.02  | -0.09 | -0.30 | 0.14  | -0.12 | 1.00  |       |       |       |       |       |       |       |       |      |       |       |      |      |       |
| Pro        | -0.06          | -0.41 | 0.42  | 0.53  | -0.26 | -0.17 | 0.17  | 0.02  | 0.10  | -0.06 | 0.01  | 0.17  | -0.15 | 1.00  |       |       |       |       |       |       |       |      |       |       |      |      |       |
| Ile        | 0.26           | -0.05 | 0.70  | 0.01  | 0.21  | 0.11  | 0.24  | -0.05 | -0.12 | 0.43  | -0.23 | 0.42  | -0.42 | 0.39  | 1.00  |       |       |       |       |       |       |      |       |       |      |      |       |
| Leu        | 0.36           | 0.06  | 0.55  | 0.14  | -0.04 | -0.16 | 0.25  | -0.03 | -0.22 | 0.07  | -0.27 | 0.07  | -0.31 | 0.08  | 0.46  | 1.00  |       |       |       |       |       |      |       |       |      |      |       |
| Met        | -0.01          | 0.30  | 0.19  | 0.11  | 0.15  | 0.12  | 0.38  | 0.37  | 0.16  | 0.12  | -0.03 | 0.35  | -0.22 | -0.29 | -0.03 | 0.20  | 1.00  |       |       |       |       |      |       |       |      |      |       |
| Phe        | -0.19          | 0.33  | -0.02 | -0.14 | 0.46  | 0.48  | 0.34  | 0.21  | -0.16 | 0.40  | 0.28  | 0.37  | 0.12  | -0.40 | -0.22 | -0.25 | 0.26  | 1.00  |       |       |       |      |       |       |      |      |       |
| Trp        | 0.24           | -0.16 | 0.37  | 0.36  | -0.26 | -0.37 | 0.05  | 0.02  | 0.00  | -0.22 | -0.23 | -0.06 | -0.28 | 0.38  | 0.27  | 0.51  | 0.11  | -0.66 | 1.00  |       |       |      |       |       |      |      |       |
| Val        | 0.27           | -0.02 | 0.42  | 0.42  | -0.21 | -0.13 | 0.25  | 0.07  | -0.02 | -0.02 | -0.26 | 0.21  | -0.26 | 0.47  | 0.38  | 0.72  | 0.20  | -0.39 | 0.60  | 1.00  |       |      |       |       |      |      |       |
| Orn        | 0.25           | 0.38  | 0.48  | 0.37  | 0.17  | 0.24  | 0.54  | 0.44  | -0.10 | 0.38  | 0.05  | 0.67  | -0.07 | 0.13  | 0.29  | 0.30  | 0.49  | 0.11  | 0.36  | 0.43  | 1.00  |      |       |       |      |      |       |
| Cit        | x              | x     | x     | x     | x     | x     | x     | x     | x     | x     | x     | x     | x     | x     | x     | x     | x     | x     | x     | x     | x     | 1.00 |       |       |      |      |       |
| Tau        | -0.26          | -0.02 | -0.18 | 0.07  | 0.02  | -0.13 | -0.01 | 0.23  | 0.11  | -0.22 | 0.06  | -0.15 | 0.45  | -0.29 | -0.22 | -0.35 | 0.23  | 0.08  | -0.13 | -0.42 | 0.04  | x    | 1.00  |       |      |      |       |
| AABA       | 0.55           | 0.25  | 0.08  | -0.10 | 0.17  | -0.04 | 0.10  | 0.09  | 0.03  | -0.01 | -0.12 | -0.14 | -0.38 | -0.17 | 0.14  | 0.31  | 0.11  | -0.13 | 0.39  | 0.14  | 0.21  | x    | -0.06 | 1.00  |      |      |       |
| BABA       | 0.01           | 0.06  | -0.21 | -0.17 | 0.04  | 0.31  | -0.12 | -0.07 | -0.07 | 0.12  | 0.09  | 0.16  | 0.26  | -0.28 | -0.14 | -0.45 | -0.12 | 0.46  | -0.58 | -0.58 | -0.24 | x    | 0.24  | -0.23 | 1.00 |      |       |
| GABA       | 0.08           | -0.09 | 0.41  | 0.47  | 0.01  | -0.16 | 0.11  | 0.12  | -0.02 | -0.04 | -0.06 | 0.36  | 0.06  | 0.21  | 0.29  | 0.13  | 0.35  | -0.13 | 0.44  | 0.13  | 0.51  | x    | 0.38  | 0.10  | 0.11 | 1.00 |       |
| β-Ala      | x              | x     | x     | x     | x     | x     | x     | x     | x     | x     | x     | x     | x     | x     | x     | x     | x     | x     | x     | x     | x     | x    | x     | x     | x    | x    | 1.00  |



| Amino acid | SOP population |       |       |       |       |       |       |       |       |       |       |       |       |       |       |       |       |       |       |       |       |      |      |      |      |      |       |  |
|------------|----------------|-------|-------|-------|-------|-------|-------|-------|-------|-------|-------|-------|-------|-------|-------|-------|-------|-------|-------|-------|-------|------|------|------|------|------|-------|--|
|            | Asp            | Glu   | Ala   | Cys   | Gly   | Ser   | Thr   | Tyr   | Arg   | Asn   | Gln   | His   | Lys   | Pro   | Ile   | Leu   | Met   | Phe   | Trp   | Val   | Orn   | Cit  | Tau  | AABA | BABA | GABA | β-Ala |  |
| Asp        | 1.00           |       |       |       |       |       |       |       |       |       |       |       |       |       |       |       |       |       |       |       |       |      |      |      |      |      |       |  |
| Glu        | 0.07           | 1.00  |       |       |       |       |       |       |       |       |       |       |       |       |       |       |       |       |       |       |       |      |      |      |      |      |       |  |
| Ala        | 0.07           | -0.06 | 1.00  |       |       |       |       |       |       |       |       |       |       |       |       |       |       |       |       |       |       |      |      |      |      |      |       |  |
| Cys        | 0.21           | 0.63  | 0.34  | 1.00  |       |       |       |       |       |       |       |       |       |       |       |       |       |       |       |       |       |      |      |      |      |      |       |  |
| Gly        | 0.25           | -0.01 | -0.15 | -0.13 | 1.00  |       |       |       |       |       |       |       |       |       |       |       |       |       |       |       |       |      |      |      |      |      |       |  |
| Ser        | 0.07           | -0.36 | 0.42  | -0.24 | 0.31  | 1.00  |       |       |       |       |       |       |       |       |       |       |       |       |       |       |       |      |      |      |      |      |       |  |
| Thr        | 0.20           | 0.12  | -0.09 | 0.04  | 0.31  | 0.06  | 1.00  |       |       |       |       |       |       |       |       |       |       |       |       |       |       |      |      |      |      |      |       |  |
| Tyr        | 0.02           | 0.38  | 0.12  | 0.50  | 0.09  | -0.09 | -0.09 | 1.00  |       |       |       |       |       |       |       |       |       |       |       |       |       |      |      |      |      |      |       |  |
| Arg        | 0.16           | 0.04  | 0.71  | 0.30  | -0.24 | 0.43  | -0.14 | 0.13  | 1.00  |       |       |       |       |       |       |       |       |       |       |       |       |      |      |      |      |      |       |  |
| Asn        | -0.12          | -0.27 | 0.28  | -0.08 | -0.21 | 0.25  | 0.21  | 0.02  | 0.46  | 1.00  |       |       |       |       |       |       |       |       |       |       |       |      |      |      |      |      |       |  |
| Gln        | 0.00           | 0.10  | 0.40  | 0.47  | -0.20 | -0.16 | 0.21  | 0.17  | 0.17  | 0.15  | 1.00  |       |       |       |       |       |       |       |       |       |       |      |      |      |      |      |       |  |
| His        | -0.12          | 0.03  | 0.12  | 0.14  | -0.23 | -0.06 | -0.59 | -0.04 | 0.31  | 0.10  | 0.13  | 1.00  |       |       |       |       |       |       |       |       |       |      |      |      |      |      |       |  |
| Lys        | -0.12          | 0.11  | 0.43  | 0.20  | -0.04 | 0.37  | -0.17 | 0.23  | 0.16  | -0.01 | 0.27  | 0.08  | 1.00  |       |       |       |       |       |       |       |       |      |      |      |      |      |       |  |
| Pro        | -0.23          | 0.05  | -0.38 | -0.13 | -0.16 | -0.26 | 0.12  | -0.06 | -0.30 | -0.05 | -0.25 | -0.24 | -0.43 | 1.00  |       |       |       |       |       |       |       |      |      |      |      |      |       |  |
| Ile        | -0.10          | -0.02 | 0.26  | 0.17  | 0.11  | 0.29  | 0.04  | 0.25  | 0.16  | 0.45  | 0.33  | 0.30  | 0.33  | -0.24 | 1.00  |       |       |       |       |       |       |      |      |      |      |      |       |  |
| Leu        | -0.07          | -0.19 | 0.27  | 0.01  | -0.12 | -0.13 | -0.17 | 0.08  | 0.29  | 0.43  | 0.03  | 0.37  | -0.24 | 0.09  | 0.25  | 1.00  |       |       |       |       |       |      |      |      |      |      |       |  |
| Met        | -0.17          | 0.10  | 0.42  | 0.30  | -0.55 | -0.15 | -0.02 | 0.18  | 0.38  | 0.33  | 0.25  | 0.01  | 0.18  | 0.17  | -0.01 | 0.38  | 1.00  |       |       |       |       |      |      |      |      |      |       |  |
| Phe        | -0.01          | -0.10 | 0.48  | 0.14  | -0.43 | 0.17  | -0.11 | 0.12  | 0.53  | 0.26  | 0.32  | 0.08  | -0.08 | 0.07  | 0.05  | 0.07  | 0.47  | 1.00  |       |       |       |      |      |      |      |      |       |  |
| Trp        | -0.22          | -0.15 | 0.38  | -0.01 | -0.48 | -0.13 | -0.22 | -0.04 | 0.32  | 0.37  | 0.19  | 0.42  | 0.00  | 0.08  | 0.13  | 0.61  | 0.66  | 0.39  | 1.00  |       |       |      |      |      |      |      |       |  |
| Val        | -0.04          | -0.24 | 0.04  | -0.17 | -0.31 | 0.05  | -0.34 | 0.02  | 0.13  | 0.36  | 0.02  | 0.34  | 0.01  | -0.25 | 0.31  | 0.15  | 0.12  | 0.33  | 0.35  | 1.00  |       |      |      |      |      |      |       |  |
| Orn        | 0.08           | 0.13  | 0.26  | 0.23  | 0.26  | 0.51  | 0.05  | 0.25  | 0.04  | -0.13 | -0.08 | -0.08 | 0.72  | -0.25 | 0.29  | -0.28 | -0.05 | -0.24 | -0.26 | -0.24 | 1.00  |      |      |      |      |      |       |  |
| Cit        | x              | x     | x     | x     | x     | x     | x     | x     | x     | x     | x     | x     | x     | x     | x     | x     | x     | x     | x     | x     | x     | 1.00 |      |      |      |      |       |  |
| Tau        | x              | x     | x     | x     | x     | x     | x     | x     | x     | x     | x     | x     | x     | x     | x     | x     | x     | x     | x     | x     | x     | x    | 1.00 |      |      |      |       |  |
| AABA       | 0.10           | -0.17 | -0.09 | -0.26 | -0.31 | -0.14 | 0.08  | -0.12 | -0.17 | 0.17  | 0.02  | -0.25 | 0.07  | 0.16  | 0.00  | -0.18 | -0.15 | 0.01  | -0.02 | -0.02 | -0.04 | x    | x    | 1.00 |      |      |       |  |
| BABA       | 0.22           | 0.24  | 0.05  | 0.01  | -0.11 | 0.18  | 0.04  | -0.20 | 0.35  | 0.12  | -0.34 | 0.02  | -0.05 | 0.17  | -0.11 | -0.09 | 0.01  | 0.03  | -0.03 | 0.03  | -0.06 | x    | x    | 0.07 | 1.00 |      |       |  |
| GABA       | 0.12           | -0.05 | 0.03  | -0.11 | 0.12  | 0.34  | 0.51  | -0.39 | 0.10  | 0.00  | -0.04 | -0.40 | -0.16 | 0.06  | -0.25 | -0.40 | -0.20 | 0.20  | -0.24 | -0.18 | -0.07 | x    | x    | 0.03 | 0.38 | 1.00 |       |  |
| β-Ala      | x              | x     | x     | x     | x     | x     | x     | x     | x     | x     | x     | x     | x     | x     | x     | x     | x     | x     | x     | x     | x     | x    | x    | x    | x    | x    | 1.00  |  |



**Table S8.** Kaiser-Meyer-Olkin test results for amino acids' dataset used for principal components analysis sorted in descending order by the measure of sampling adequacy (MSA) (overall MSA = 0.95).

| Parameter                          | MSA  |
|------------------------------------|------|
| Tyrosine (Tyr)                     | 0.98 |
| Tryptophan (Trp)                   | 0.98 |
| Valine (Val)                       | 0.98 |
| Threonine (Thr)                    | 0.97 |
| Arginine (Arg)                     | 0.97 |
| Asparagine (Asn)                   | 0.97 |
| Leucine (Leu)                      | 0.97 |
| $\alpha$ -aminobutyric acid (AABA) | 0.97 |
| Aspartic acid (Asp)                | 0.96 |
| Serine (Ser)                       | 0.96 |
| Glutamine (Gln)                    | 0.96 |
| Histidine (His)                    | 0.96 |
| Proline (Pro)                      | 0.96 |
| Isoleucine (Ile)                   | 0.96 |
| Methionine (Met)                   | 0.96 |
| $\beta$ -alanine ( $\beta$ -Ala)   | 0.96 |
| Cysteine (Cys)                     | 0.95 |
| Taurine (Tau)                      | 0.95 |
| Lysine (Lys)                       | 0.94 |
| Glutamic acid (Glu)                | 0.93 |
| Alanine (Ala)                      | 0.93 |
| $\beta$ -aminobutyric acid (BABA)  | 0.93 |
| Glycine (Gly)                      | 0.92 |
| Ornithine (Orn)                    | 0.92 |
| $\gamma$ -aminobutyric acid (GABA) | 0.92 |
| Citrulline (Cit)                   | 0.89 |
| Phenylalanine (Phe)                | 0.44 |
